1 **Screening of HLA-A restricted T cell epitopes of SARS-CoV-2 and induction of CD8<sup>+</sup> T**  
2 **cell responses in HLA-A transgenic mice**

3 Xiaoxiao Jin<sup>1#</sup>, Yan Ding<sup>1#</sup>, Shihui Sun<sup>2#</sup>, Xinyi Wang<sup>1</sup>, Zining Zhou<sup>1</sup>, Xiaotao Liu<sup>1</sup>,  
4 Miaomiao Li<sup>3</sup>, Xian Chen<sup>3</sup>, Anran Shen<sup>4</sup>, Yandan Wu<sup>1</sup>, Bicheng Liu<sup>4</sup>, Jianqiong Zhang<sup>1</sup>, Jian  
5 Li<sup>5</sup>, Yi Yang<sup>6</sup>, Haibo Qiu<sup>6</sup>, Chuanlai Shen<sup>1,6\*</sup>, Yuxian He<sup>7\*</sup>, Guangyu Zhao<sup>2\*</sup>

6  
7 <sup>1</sup>Department of Microbiology and Immunology, Medical School of Southeast University,  
8 Nanjing, Jiangsu, China 210009

9 <sup>2</sup>State Key Laboratory of Pathogen and Biosecurity, Beijing Institute of Microbiology and  
10 Epidemiology, Beijing, China 100071

11 <sup>3</sup>Blood Component Preparation Section, Jiangsu Province Blood Center, Nanjing, Jiangsu,  
12 China 210042

13 <sup>4</sup>Institute of Nephrology, Zhongda Hospital, Medical School of Southeast University, Nanjing,  
14 Jiangsu, China 210009

15 <sup>5</sup>Life Science & Technology School of Southeast University, Nanjing, Jiangsu, China 210096

16 <sup>6</sup>Jiangsu Province Key Laboratory of Critical Care Medicine, Department of Critical Care  
17 Medicine, Zhongda Hospital, Medical School of Southeast University, Nanjing, Jiangsu,  
18 China 210009

19 <sup>7</sup>Institute of Pathogen Biology, Chinese Academy of Medical Sciences and Peking Union  
20 Medical College, Beijing, China 100730

21

22 Running title: T cell epitopes of SARS-CoV-2 and induction of CD8<sup>+</sup> T cell responses

23

24 # These authors have equal contributions to this work.

25

26 \* Corresponding authors:

27 Chuanlai Shen: [chuanlaishen@seu.edu.cn](mailto:chuanlaishen@seu.edu.cn); Yuxian He: [yhe@ipb.pumc.edu.cn](mailto:yhe@ipb.pumc.edu.cn);

28 Guangyu Zhao: [guangyu0525@163.com](mailto:guangyu0525@163.com)

29

30 **Abstract**

31 While SARS-CoV-2-specific T cells have been characterized to play essential roles in host  
32 immune protection in COVID-19 patients, few researches focus on the functional validation  
33 of T cell epitopes and development of vaccines inducing specific T cell responses. In this  
34 study, 120 CD8<sup>+</sup> T cell epitopes from E, M, N, S and RdRp proteins were validated. Among  
35 them, 110 epitopes have not been reported previously; 110, 15, 6, 14 and 12 epitopes were  
36 highly homologous with SARS-CoV, OC43, NL63, HKU1, and 229E, respectively; 4 epitopes  
37 from S protein displayed one amino acid distinct from the current variants of SARS-CoV-2.  
38 Thirty-one epitopes restricted by HLA-A2 molecule were used to generate peptide cocktail  
39 vaccines in combination with Poly(I:C), R848 or polylactic-co-glycolic acid nanoparticles,  
40 which elicited robust specific CD8<sup>+</sup> T cell responses in wild-type and HLA-A2/DR1  
41 transgenic mice. Seven of the 31 epitopes were found to be cross-presented by HLA-A2 and  
42 H-2K/D<sup>b</sup> molecules. Unlike previous researches, this study established a modified cell  
43 co-culture system of DC-peptide-PBL using healthy donor's PBMCs to validate the CD8<sup>+</sup> T  
44 cell epitope on-silicon predicted; provided a library of CD8<sup>+</sup> T cell epitopes restricted by a  
45 series of high-frequency HLA-A allotypes which covering broad Asian populations; identified  
46 the HLA-A cross-restrictions of these CD8<sup>+</sup> T cell epitopes using competitive binding  
47 experiments with HMy2.CIR cell lines expressing indicated HLA-A molecules; and initially  
48 confirmed the *in vivo* feasibility of 9 or 10-mer peptide cocktail vaccines of SARS-CoV2.  
49 These data will facilitate the development of vaccines inducing antiviral CD8<sup>+</sup> T cell  
50 responses.

51 **Key words:** SARS-CoV-2; T cell epitope; HLA-A; Vaccine

## 52 **Introduction**

53 The highly contagious COVID-19 has spread worldwide at an unprecedentedly quick speed  
54 since its first identification at December 2019, leading to an ongoing global pandemic<sup>1</sup>. As 22  
55 of April, 2021, there have been more than 143 million confirmed cases and over 3.0 million  
56 deaths. Although relentless efforts have been paid in effective vaccine race, there are still  
57 many risks for a long-term immune protection<sup>2</sup>, since host immunity to Severe Acute  
58 Respiratory Syndrome Coronavirus 2 (SARS-CoV-2) has not been fully understood. Currently,  
59 most vaccines focus on the induction of neutralizing antibodies against spike (S) protein of  
60 SARS-CoV-2<sup>3,4</sup>, which can block the virus from entering and infecting human cells, helping  
61 the immune system to clear the virus and to prevent future infections<sup>5</sup>. However, researchers  
62 have found that circulating antibodies to SARS-Cov-2 declined rapidly and persisted only  
63 around seven months. And, certain patients who are asymptomatic or mildly symptomatic do  
64 not have detectable neutralizing antibodies<sup>6</sup>. In addition, growing incidence of COVID-19  
65 re-infections emerges since the first reported re-infection in August, 2020. This suggests that  
66 neutralizing antibodies cannot offer long-term protection. Furthermore, SARS-CoV-2  
67 constantly undergoes mutations as it spread from person to person. Therefore, more studies  
68 are needed to determine whether the current vaccines will be still effective against the virus  
69 quasispecies.

70 It has been studies that T cells, especially CD8<sup>+</sup> T cells, also play a critical role in the  
71 defense of many viral infections<sup>7</sup>. Increasing evidences indicate that T cell responses are  
72 important in the immune response against SARS-CoV-2, and may mediate long-term  
73 protection<sup>8-12</sup>. The specific T cells showed a highly activated cytotoxic phenotype in the acute

74 phase that correlated with various clinical markers of disease severity, whereas the  
75 convalescent-phase specific T cells were multifunctional and showed a stem cell-like memory  
76 phenotype in the mild and asymptomatic patients<sup>12-19</sup>. Moreover, intensive expansion of  
77 highly cytotoxic T cells was associated with convalescence in moderate patients<sup>19</sup>.  
78 SARS-CoV-2-specific T cells were detectable in antibody-seronegative exposed family  
79 members and convalescent individuals with a history of asymptomatic and mild COVID-19<sup>12</sup>.  
80 As a result, T cell immunity would be critical in the pathogenesis and immune protection  
81 mechanism of COVID-19, thus providing a potential way to develop long-term effective  
82 vaccines and treatments<sup>20</sup>. However, thus far limited information is available about the  
83 vaccines inducing T cell immune protections against SARS-CoV-2. Very recently,  
84 SARS-CoV-2 T cell epitopes restricted by H-2<sup>d</sup> and H-2<sup>b</sup> molecules were identified, and three  
85 of which were used to generate the venezuelan equine encephalitis replicon particles (VRP)  
86 expressing single T cell epitope<sup>21</sup>. This VRP vaccine induced robust CD4<sup>+</sup> or CD8<sup>+</sup> T cell  
87 responses, which mediated more rapid viral clearance than neutralizing antibodies and  
88 decreased the extent of lung pathological changes in Ad5-ACE2-transduced and  
89 SARS-CoV-2-infected mice<sup>21</sup>, indicating the potential of T cell epitope vaccine. In addition,  
90 HLA-DR-restricted peptides cocktail vaccine from Tubingen University of Germany has been  
91 enrolled in phase I clinical trial (NCT04546841). Whether the 9- or 10-mer peptides cocktail  
92 restricted by HLA class I molecule can induce SARS-CoV-2 specific CD8<sup>+</sup> T cell responses *in*  
93 *vivo* remains unknown.

94 Identification of T cell epitopes in SARS-CoV-2 proteins can contribute greatly to the  
95 development of T cell epitope vaccines and precise evaluation of host cellular immunity.

96 However, most studies have utilized pools of predicted or overlapping peptides spanning the  
97 sequences of different SARS-CoV-2 proteins<sup>22-28</sup>. The functionally validated T cell epitopes  
98 are still limited and have thus far come from only a few laboratories<sup>10, 11, 29-32</sup>. These T cell  
99 epitopes are presented only by several HLA class I or II molecules and the precise HLA  
100 restrictions of each epitope needs to be further defined.

101 To screen more CD8<sup>+</sup> T cell epitopes which cover more predominant HLA-A allotypes  
102 and more SARS-CoV-2 proteins, here we dedicated to the mapping of HLA-A-restricted  
103 epitopes from envelope proteins (E), membrane protein (M), nucleocapsid protein (N), spike  
104 glycoprotein (S) and RNA-dependent RNA polymerase (RdRp) of SARS-CoV-2. Four  
105 hundred and nine epitopes, which restricted by nine high-frequency HLA-A allotypes, were  
106 on-silicon predicted and selected. Then the immunogenicity and HLA-A cross-restrictions of  
107 120 epitopes were validated by DC-peptide-PBL co-culture experiments using healthy donors'  
108 PBMCs and competitive binding experiments with HMy2. CIR cell lines expressing indicated  
109 HLA-A molecules. Thirty-one epitope peptides restricted by HLA-A2 molecule were used to  
110 generate the 9- or 10-mer peptide cocktail vaccines in combination with Poly(I:C), R848 or  
111 poly(lactic-co-glycolic acid) nanoparticles (PLGA-NPs), which induced robust SARS-CoV-2  
112 specific CD8<sup>+</sup> T cell responses in HLA-A2/DR1 transgenic mice and wild-type mice.

113

## 114 **Results**

### 115 **1. HLA-A restricted 409 T cell epitopes were on-silicon predicted and selected from** 116 **SARS-CoV-2 proteins**

117 SARS-CoV-2 T cell epitopes, which restricted by nine high-frequency HLA-A allotypes

118 (HLA-A\*02:01, A\*11:01, A\*24:02, A\*02:06, A\*02:07, A\*33:03, A\*30:01, A\*02:03, or  
119 A\*11:02) with the total gene frequency of around 87% in Chinese population  
120 (<http://www.allelefrequencies.net>), were predicted from four structural protein (E, M, N, S)  
121 and one non-structural protein (RdRP) using five epitope predication tools (IEDB-ANN,  
122 IEDB-SMM, SYFPEITHI, EPIJEN, NetMHC and ConvMHC). For each HLA-A molecule  
123 and each protein, one to twenty 9- or 10-mer peptides with the highest score (highest affinity)  
124 were selected as candidate epitopes. A total of 409 peptides restricted by indicated HLA-A  
125 molecules were finally selected as candidate epitopes with the number of 45, 63, 71, 130, and  
126 100 from E, M, N, S and RdRp proteins, respectively. Among them, 139 indicated epitopes  
127 are common or highly homologous epitopes cross-presented by several HLA-A molecules,  
128 thus finally only 270 indicated candidate epitope peptides (9-mer or 10-mer) were synthesized  
129 for further identification ([Table S1](#)).

## 130 **2. Immunogenicity of 120 candidate epitopes was validated by DC-peptide-PBL** 131 **co-culture experiments**

132 In order to validate the immunogenicity of candidate epitopes, PBMCs from healthy blood  
133 donors were collected and HLA-A alleles were identified. DCs were induced for 7 days and  
134 then coincubated with candidate epitope peptides and autologous PBL for 14 days. Cells were  
135 harvested and stimulated by corresponding candidate peptides for another 16 hours followed  
136 by IFN- $\gamma$  intracellular staining (ICS) and flow cytometry. In some DC-peptide-PBL co-culture  
137 wells, the autologous PBLs were pre-labeled with CFSE. After 14-day co-cultures, the cells  
138 were harvested followed by flow cytometry to detect the proliferation percentage of CD8<sup>+</sup> T  
139 cell. When the frequency of IFN- $\gamma$ <sup>+</sup> T cells in CD3<sup>+</sup>/CD8<sup>+</sup> T cell population increased by more

140 than 100% compared with the negative control or proliferation percentage of CD8<sup>+</sup> T cells in  
141 CD3<sup>+</sup>/CD8<sup>+</sup> T cell population increased by more than 20% compared with the negative  
142 control, the candidate epitope peptide in the co-culture well was identified as positive peptide  
143 with immunogenicity.

144 To evaluate whether this procedure is sensitive for identification of peptide  
145 immunogenicity, several reference peptides were tested using this DC-peptide-PBL co-culture  
146 procedure. These HLA-A restricted T cell epitopes derived from hepatocellular carcinoma  
147 (HCC)-associated tumor antigens (HCC 1-1, HCC 1-2, HCC 5-3, HCC 5-4, HCC 5-5) or from  
148 hepatitis B virus antigens (HBV 111, HBV 118) have been validated as real-world epitopes  
149 previously in-house by using HCC patients' PBMCs or chronic hepatitis patient's PBMCs  
150 (manuscript submitted). They can effectively stimulate the patient's fresh PBMCs to produce  
151 IFN- $\gamma$  in *ex vivo* 20-hour co-culture as detected by ELISPOT assay. Here, they were also  
152 defined as positive peptides in DC-peptide-PBL co-cultures using healthy donor's PBMCs as  
153 detected by intracellular IFN- $\gamma$  staining and CFSE proliferation analyses, meanwhile the weak  
154 positive reference peptides (HCC 1-1, HCC 1-2) were defined as negative peptides here  
155 (Figure 1).

156 After the PBMC samples from 156 healthy donors were tested, a total of 120 candidate  
157 epitope peptides of SARS-CoV-2 have been defined as antigenic T cell epitopes by using the  
158 DC-peptide-PBL procedure, which indicating that they can elicit naive peptide-specific CD8<sup>+</sup>  
159 T cells to activate and produce IFN- $\gamma$  or proliferate after 14 days co-stimulation. Some  
160 candidate epitope peptides have been validated in several healthy donor' PBMCs. 110 of 120  
161 positive epitopes have not been reported previously. The detailed data of all positive peptides

162 were summarized in [Table 1](#). Of them, the number of epitopes derived from E (75aa), M  
163 (222aa), N (419aa), S (1273aa) and RdRp (932aa) proteins is 18, 27, 12, 36, and 27,  
164 respectively, with a relatively bias distribution. The density of CD8<sup>+</sup> T cell epitopes per 10 aa  
165 is 2.40, 1.216, 0.286, 0.283, and 0.290, respectively. Their sequence homology between  
166 SARS-CoV-2 and other HCoV-229E were aligned and exhibited in [Table S2](#). Of the 120 validated  
167 SARS-CoV-2 CD8<sup>+</sup> T cell epitopes, 110, 15, 6, 14 and 12 epitopes were highly homologous  
168 (0-2 amino acids deviation) with SARS-CoV, OC43, NL63, HKU1, and 229E, respectively.  
169 The common epitopes with common-cold HCoV-229E mainly locate in RdRp protein (39/47). In  
170 addition, 4 epitopes displayed one amino acid distinct from the current mutant variants, such  
171 as D50 and D82 for B.1.1.7, D82 for B.1.351 and P.1, D78 for B.1.617, and D53 for Denmark  
172 Variant ([Table S2](#)).

173 [Figure S1](#) showed the phenotypes of mature DC as verified by flow cytometry. [Figure 2](#)  
174 presented the IFN- $\gamma$  ICS flow plots and CD8<sup>+</sup> T cell proliferation flow plots of partial positive  
175 peptides. All flow plots of 120 positive peptides were displayed in [Figure S2](#) and [S3](#).

### 176 3. Binding affinity and cross-binding of positive epitope peptides with HLA-A allotypes

177 HMy2.CIR is a human B lymphocyte strain with HLA class I antigen deficiency, which does  
178 not express HLA-A and B molecules and only expresses trace HLA-Cw4. To assess the  
179 affinity of the positive peptides with the corresponding HLA-A molecules, the transfected  
180 HMy2.CIR cell lines expressing indicated HLA-A molecules (HLA-A2402, A0203, A0201,  
181 A0206, A1101, A3303, A0101, or A3001) were generated firstly, sorted by flow cytometry,  
182 and identified by sequencing. The purity of these transfected CIR cell lines after sorting was  
183 80% to 94% ([Figure S4](#)).



184 Then, the unlabeled positive peptides of SRAS-CoV-2 competed with fluorescent-labeled  
185 reference peptides for binding with the corresponding HLA-A molecules onto indicated  
186 transfected cell lines for 24 hours. As the FACS data showed, most positive peptides could  
187 result in a left shift of the fluorescent peak of reference peptide (Figure S5). According to the  
188 IC50, peptides were classified into three categories. Binding affinity was high when IC50 was  
189 less than 5  $\mu$ M, intermediate when between 5  $\mu$ M and 15 $\mu$ M, and low or no binding when  
190 more than 15  $\mu$ M. Table 2 exhibited the binding affinity of each tested peptides with  
191 associated HLA-A molecules. These data also revealed the cross-binding of indicated peptide  
192 with different HLA-A allotypes (Table 3). Surprisingly, all epitopes derived from E protein  
193 displayed low affinity with corresponding HLA-A allotypes in this HLA-A competitive  
194 binding assay (Table 3), but these data are inconsistent with the results from DC-peptide-PBL  
195 costimulation and vaccine immunization in HLA-A2/DR1 transgenic mice.

#### 196 **4. The peptide cocktail vaccines induced robust specific CD8<sup>+</sup> T cell responses in** 197 **HLA-A2/DR1 transgenic mice**

198 To determine whether these peptides which was validated by DC-peptide-PBL co-culture  
199 experiments can stimulate T cell responses *in vivo*, 31 positive epitope peptides restricted by  
200 HLA-A2 molecule (HLA-A0201, A0203, A0206, A0207) were grouped into 4 peptide pools  
201 (Table S3) and were used to generate peptide cocktail vaccines in three formulations: the  
202 peptides-encapsulated and -surface coupled PLGA-NPs/peptides (Vaccine A),  
203 R848/peptides (Vaccine B), and poly I:C/peptides (Vaccine C) (Table S4). Additionally, T2  
204 cell binding assay was used to define the affinity of the 31 epitopes with HLA-A0201  
205 molecule. T2 cells were incubated with indicated peptide or no peptide and  $\beta$ 2-microglobulin

206 for 16 hours. Then, peptide-induced up-regulation of HLA-A0201 expression on T2 cells was  
207 measured by PE-labeled anti-HLA-A2.1 antibody staining and flow cytometry (Figure S6).  
208 According to the fluorescence index (FI), 18 epitopes showed high affinity ( $FI > 1.0$ ), 7  
209 epitopes displayed intermediate affinity ( $1.0 \geq FI > 0.5$ ), and 6 epitopes exhibited low or no  
210 binding ( $FI \leq 0.5$ ) with HLA-A0201 molecules (Table S5). Finally, HLA-A0201<sup>+/+</sup>/DR1<sup>+/+</sup>  
211 transgenic and H-2- $\beta$ 2m<sup>-/-</sup>/I-A $\beta$ <sup>-/-</sup> C57BL/6 mice were immunized with the three vaccines  
212 respectively. After three rounds *in vivo* stimulation, splenocytes of primed mice were tested  
213 for peptide-specific T cell responses by IFN- $\gamma$ -ELSPOT, IFN- $\gamma$ -ICS and IFN- $\gamma$ -ELISA.

214 The 31 positive peptides were grouped into eight pools (Table S3) according to their  
215 derived proteins and the features of acid and alkalinity. Then splenocytes from each mouse  
216 were coincubated with each peptides pool or PBS for 20 hours in 96-well PVDF membrane  
217 plate and followed by IFN- $\gamma$ -ELSPOT assay. The total spot forming unit (SFU) in  $2 \times 10^5$   
218 splenocytes from each mouse in the three vaccine groups was 400-500 times more than that  
219 from control group (Figure 3A). Interestingly, splenocytes in all vaccine groups showed  
220 almost the strongest T cell responses to E protein and weakest T cell responses to N protein  
221 relative to other antigens (Figure 3B). Figure 4 presented the spots of ELISPOT assay from all  
222 mice. Two irrelevant CD8<sup>+</sup> T cell epitope peptides (AFP<sub>158-166</sub> and AFP<sub>424-432</sub>) were used as  
223 antigen-irrelevant control groups and obtained the negative results similar to that in no  
224 peptide group.

225 To further confirm the results from ELISPOT assay and the specific CD8<sup>+</sup> T cell  
226 responses, IFN- $\gamma$  intracellular cytokine staining was performed. The 31 positive peptides were  
227 grouped into five pools (Table S3) according to their derived proteins. Then splenocytes from

228 each mouse were coincubated with each peptides pool or PBS for 16 hours in 48-well plate  
229 and followed by another 6 hours coincubation with BFA/Monensin mixture. The resulting ICS  
230 showed that the frequencies of IFN- $\gamma$ <sup>+</sup> in CD3<sup>+</sup>CD8<sup>+</sup> T cell populations from the three vaccine  
231 groups were about 20-30 times higher than that in control mice (Figure 3C). Splenocytes in  
232 vaccine A group showed the strongest CD8<sup>+</sup> T cell responses to RdRP while splenocytes in  
233 vaccine C group showed the strongest CD8<sup>+</sup> T cell responses to E protein (Figure 3D). Figure  
234 5 presented the flow plots for ICS from all mice. Also, two irrelevant CD8<sup>+</sup> T cell epitope  
235 peptides (AFP<sub>158-166</sub> and AFP<sub>424-432</sub>) were used and obtained the results similar to the no  
236 peptide group.

237 Furthermore, ELISA was carried out to quantify IFN- $\gamma$  in the supernatant after the  
238 splenocytes were incubated with each of the five peptide pools or PBS in 48-well plate for 72  
239 hours. Accumulations of IFN- $\gamma$  in the supernatant of the three vaccine groups were about  
240 15-30 times higher than that in control group (Figure 6A), which is consistent with the results  
241 of ELISPOT and ICS. Splenocytes in all three vaccine groups showed relatively stronger  
242 responses to RdRP protein (Figure 6B).

243 Taken together, these results indicated that all three forms of epitope peptide cocktail  
244 vaccines can stimulate robust specific CD8<sup>+</sup> T cell responses in HLA-A2/DR1 transgenic  
245 mice, implying the potential of these validated SARS-CoV-2 T cell epitopes to be applied in  
246 vaccine development. Of note, the mouse-3 in Vaccine B group (R848/peptide vaccine)  
247 showed only weak or no T cell responses as detected by ELSPOT, ICS and ELISA. This  
248 failure may be due to the weak reactivity of entire T cell repertoire since the SFU of  $2 \times 10^5$   
249 splenocytes was much less than other primed mice after stimulated by mitogen PHA as

250 detected by ELISPOT (70 vs.  $832.2 \pm 328.9$ ). In order to further confirm the *in vivo* results,  
251 Vaccine C (poly I:C/peptides) immunization experiment was repeated in the  
252 HLA-A0201<sup>+/+</sup>/DR1<sup>+/+</sup> transgenic and H-2- $\beta$ 2m<sup>-/-</sup>/I-A $\beta$ <sup>-/-</sup> C57BL/6 mice and induced similar  
253 trend of robust CD8<sup>+</sup> T cell responses compared to control group.

## 254 **5. The peptide cocktail vaccine induced CD8<sup>+</sup> T cell responses in wild-type C57BL/6** 255 **mice**

256 To investigate whether the HLA-A2 molecules-restricted 9 or 10-mer peptides can also be  
257 cross-presented by mouse H-2K/D<sup>b</sup> molecules, the wild-type C57BL/6 mice were immunized  
258 with vaccine C (peptide pool-v1, pool-v2, pool-v3 and pool-v4 mixed with poly I:C). After  
259 three rounds of *in vivo* stimulation according to the timeline in HLA-A2/DR1 transgenic mice,  
260 splenocytes from primed C57BL/6 mice were detected by ICS. The frequencies of IFN- $\gamma$ <sup>+</sup> T  
261 cells in CD3<sup>+</sup>/CD8<sup>+</sup> populations were 4-7 times higher in the 2 of 4 vaccination mice than that  
262 in the control group (Figure 6C). The robust CD8<sup>+</sup> T cell responses were mainly against the  
263 epitopes from M, N and S protein (Figure 6D). Figure 7A presented the flow plots of all mice.  
264 Also, two irrelevant CD8<sup>+</sup> T cell epitope peptides (AFP<sub>158-166</sub> and AFP<sub>424-432</sub>) were used and  
265 obtained the results similar to the no peptide group.

266 To further identify the epitopes cross-presented by mouse H-2K/D<sup>b</sup> molecules, the  
267 splenocytes from primed Vaccine mouse-2 and Vaccine mouse-3 were coincubated with each  
268 of the 31 positive epitope peptides and followed by ICS. Flow cytometric data showed that 7  
269 of 31 epitope peptides (A5, B1, B2, B6, C2, D6 and D13) can activate the primed splenocytes  
270 with a frequency of IFN- $\gamma$ <sup>+</sup> T cells in CD3<sup>+</sup>/CD8<sup>+</sup> population two times higher than that of no  
271 *ex vivo* stimulation group (Figure 7B).

## 272 **6. T cell epitope-based peptide cocktail vaccines do not lead to visible organ toxicity**

273 To uncover whether the peptide-based vaccine immunizations cause organ toxicity, the heart,  
274 liver, lung and kidney from each mouse were checked at day 28 after the mice were  
275 inoculated three times with Vaccine A, Vaccine B or Vaccine C. The organs were immersed  
276 and stained with Hematoxylin-Eosin. As the scanning copy showed, no visible organ toxicity  
277 was found in all organs in each group ([Figure S7](#)).

278

## 279 **Discussion**

280 SARS-CoV-2 has seriously hazarded public health and the economic development all over the  
281 word. Many people are suffering from the physical symptoms or the adverse impacts caused  
282 by this major epidemic disease. Despite of great efforts made by scientists around the world,  
283 the epidemic situation is still out of control. COVID-19 vaccine development is of major  
284 importance, but mainly biased towards neutralizing antibody protection with generally less  
285 effective at eliciting CD8<sup>+</sup> T cell responses, which faces possible risk in clearing virus and in  
286 preventing from infection. Informed by protective immunity observed in natural infection,  
287 people have known that vaccine approaches that elicit antiviral SARS-CoV-2 specific CD4<sup>+</sup>  
288 and CD8<sup>+</sup> T cells in coordination with neutralizing antibodies will generate more robust and  
289 durable protective immunity<sup>20, 33</sup>. As known, memory T cell responses can persist for 6-17  
290 years after SARS-CoV infection<sup>10, 34</sup> and, in mice, protect against lethal virus challenge<sup>35</sup>. In  
291 contrast, memory B cells live short in host<sup>34, 35</sup>.

292 However, only several reports are thus far available about the vaccine candidate T cell  
293 epitopes that have been validated by functional experiments. 408 CD8<sup>+</sup> T cell epitopes

294 on-silicon predicted were applied in multiplexed peptide-MHC tetramer staining to detect the  
295 PBMCs from 30 convalescent COVID-19 patients, then 132 positive reactions were obtained  
296 with the validation of 42 CD8<sup>+</sup> T cell epitopes presented by 6 HLA allotypes (HLA-A0101,  
297 A0201, A0301, A1101, A2402 and B0702)<sup>32</sup>. Prackar et al tested the binding stability of 777  
298 CD4<sup>+</sup> and CD8<sup>+</sup> T cell epitopes that were predicted to be good binders across 11 MHC  
299 allotypes using an *in vitro* peptide MHC stability assay, and found that 174 peptides can stably  
300 bind to the HLA allotypes (HLA-A0101, A0201, A0301, A1101, A2402, B4001, C0102,  
301 C0401, C0701, C0702, DRB10401), of which 126 have not been reported previously<sup>31</sup>. After  
302 14-day cocultures of predicted epitope pools with PBMCs from healthy individuals, 142  
303 CD4<sup>+</sup> T cell epitopes were defined by immunofluorescence spot assay (FluoroSpot)<sup>30</sup>.  
304 Furthermore, using genome-wide screening technology (T-Scan), 29 CD8<sup>+</sup> T cell epitopes  
305 were identified, and presented by 6 different HLA allotypes (A0201, A0101, A0301, A1101,  
306 A2402, B0702)<sup>29</sup>. Thus far, the validated SARS-CoV-2 T cell epitopes, especially CD8<sup>+</sup> T cell  
307 epitopes, are still limited and few epitopes have been used *in vivo* as vaccines. More  
308 importantly, these validated epitopes are only presented by a few HLA allotypes which can  
309 not cover a broad population in indicated geographical regions. This may hamper the  
310 development of T cell epitope vaccines and the precise evaluation on herd cellular immune  
311 protection.

312 Unlike the previous researches about T cell epitopes of SARS-CoV-2, this study has four  
313 points of worth noting. First, this study focus on a series of high-frequency HLA-A allotypes  
314 which gather a total HLA-A allele frequency of around 87% in Chinese population while 79%,  
315 78%, 63%, 59.5%, 49.5% and 46.5% in Southeast Asia, Northeast Asia, Indonesia, South

316 America, Europe and North America populations, respectively  
317 (<http://www.allelefreqencies.net>). Since T cell epitopes spread across the proteome of  
318 SARS-CoV-2 in a relatively equal distribution<sup>9</sup>, here four structural proteins and the RdRp  
319 consisted of nsp7, nsp8 and nsp12 were screened for the identification of CD8<sup>+</sup> T cell epitopes  
320 cross-restricted by the high-frequency HLA-A allotypes. This study has provided a library of  
321 CD8<sup>+</sup> T cell epitopes that not only covers broad antigenic targets recognized by  
322 SARS-CoV-2-specific CD8<sup>+</sup> T cell clones, but also fits to the Asian herd genetic  
323 characteristics of HLA molecules, thus will facilitate the development of SARS-CoV-2  
324 vaccines inducing antiviral CD8<sup>+</sup> T cell responses for Asian populations.

325       Second, this study established a modified cell co-culture system of DC-peptide-PBL  
326 using healthy donor's PBMCs to validate the immunogenicity of CD8<sup>+</sup> T cell epitope  
327 on-silicon predicted. The most reliable and valuable method to validate the immunogenicity  
328 of candidate T cell epitopes is the detection of epitope-specific memory T cell clones in the  
329 PBMCs or other cell samples from COVID-19 patients or convalescent humans. However, it  
330 is less practicable in current China due to the difficulty obtaining clinical blood samples. So,  
331 an alternative approach using PBMCs from unexposed humans was used here. The DC-T or  
332 peptide-PBMC co-culture procedures using healthy donor's PBMCs have been generally used  
333 to validate the CD4<sup>+</sup> T cell epitopes by the exogenous antigen presenting mechanism<sup>30</sup>. In this  
334 study, DC-T and peptide-PBMC experiments were integrated as DC-peptide-PBL  
335 co-stimulation system, and initially applied for the validation of CD8<sup>+</sup> T cell epitopes. DCs  
336 were induced from the healthy donors' PBMCs, and coincubated for 14 days with candidate  
337 epitope peptides and autologous PBLs. In this co-culture system, the 9-mer or 10-mer

338 peptides are maintained in culture media at a high concentration of 20  $\mu\text{g}/\text{mL}$  during 14 days,  
339 and may be engulfed by DCs and cross-presented to  $\text{CD8}^+$  T cell by HLA-A molecules, or  
340 directly bind to the HLA-A molecules onto DCs and B cells followed by activation of naive  
341  $\text{CD8}^+$  T cells or SARS-CoV-2 cross-reactive memory  $\text{CD8}^+$  T cells. This presumption was  
342 verified at least in part by the positive results of DC-peptide-PBL experiments in this study.  
343 Many candidate epitope peptides can increase the frequency of  $\text{IFN-}\gamma^+$   $\text{CD8}^+$  T cells by 3-5  
344 times in this co-culture system. Compared with the ICS, the detection of  $\text{CD8}^+$  T cell  
345 proliferation by using CFSE-prelabeled PBLs is less sensitive. Of note is that the healthy  
346 donor's DC-T *in vitro* co-cultures usually can increase peptide-specific  $\text{CD4}^+$  T cells by  
347 around 10 times since the exogenous antigen procession and presentation mechanism<sup>30</sup>. More  
348 interestingly, 44 (36.66%) of the 120 validated  $\text{CD8}^+$  T cell epitope peptides can also  
349 simultaneously activate  $\text{CD4}^+$  T cells with the 2-6 times increase of  $\text{IFN-}\gamma^+/\text{CD4}^+$  T cell  
350 frequency or  $\text{CD4}^+$  T cell proliferation (data not shown). The underlying mechanism remains  
351 to be further elucidated.

352 In order to further confirm the sensitivity and reliability of this co-culture system, some  
353 reference  $\text{CD8}^+$  T cell epitope peptides, which were derived from HCC-associated tumor  
354 antigens or from hepatitis B virus antigens and have been validated as real-world epitopes  
355 previously in-house by using HCC patients' PBMCs or chronic hepatitis patient's PBMCs,  
356 were tested in this system and achieved positive results. In addition, HLA-A molecule  
357 competitive binding experiments also were used to confirm the binding affinity of the 120  
358 positive peptides with corresponding HLA-A molecules onto HMy2.CIR cell lines. The  
359 results are mostly consistent in that of DC-peptide-PBL experiments except the epitopes



360 derived from E protein, and further identified the HLA-A restrictions and cross-restrictions of  
361 each epitope peptides. Furthermore, the robust CD8<sup>+</sup> T cell responses elicited by the  
362 HLA-A2-binding peptide cocktails in HLA-A2/DR1 transgenic mice also indicated the *in*  
363 *vivo* immunogenicity of representative epitope peptides validated by this DC-peptide-PBL  
364 procedure.

365 For this study, the third point different from previous researches is that the HLA-A  
366 cross-restrictions of 120 positive CD8<sup>+</sup> T cell epitopes were further identified by using  
367 HLA-A molecule competitive binding experiments with HMy2.CIR cell lines expressing  
368 indicated HLA-A molecules. As known, one T cell epitope can be presented by several HLA  
369 allotypes with distinct binding affinity. The HLA molecule restrictions and cross-restrictions  
370 of most SARS-CoV-2 T cell epitopes previously reported have not been elucidated, but only  
371 have been affirmed by on-silicon prediction and mere guesswork according to the donor's  
372 HLA allele genotypes<sup>29, 30, 32</sup>.

373 More importantly, this study initially confirmed the *in vivo* feasibility of 9 or 10-mer  
374 peptide cocktail vaccines of SARS-CoV2. As known, HLA class II molecule restricted  
375 peptides (15 or 16-mer long) can induce CD4<sup>+</sup> T cell responses *in vivo*. For SARS-CoV2,  
376 HLA-DR restricted peptides cocktail vaccine from Tubingen University of Germany has been  
377 enrolled in phase I clinical trial (NCT04546841). However, few 9-mer or 10-mer CD8<sup>+</sup> T cell  
378 epitope peptides have been directly used *in vivo* as peptide vaccines. For tumor  
379 immunotherapy, tumor neoantigen peptide vaccines and mRNA vaccines have recently  
380 achieved robust T cell responses and encouraging clinical outcome<sup>36, 37</sup>. In clinical trials of  
381 melanomas<sup>38, 39</sup> and non-small cell lung cancers<sup>40</sup>, the survival of patients was significantly

382 prolonged and the recurrence rate was reduced. Patrick A. Ott<sup>38</sup> identified up to 20 neoantigen  
383 peptides restricted by HLA-A or B allotypes from each melanoma patient using whole-exome  
384 sequencing of matched tumor and normal cell DNA and RNA sequencing of the tumor.  
385 Herein, the long peptides (with the length of 15–30 amino acids containing individual CD8<sup>+</sup> T  
386 cell epitope) rather than 9-mer or 10-mer peptides were synthesized and mixed with TLR3  
387 agonist poly-ICLC to generate personal tumor neoantigen peptide vaccines. Of 6 vaccinated  
388 melanoma patients, 4 had no recurrence at 25 months post-vaccination, while 2 with  
389 progressive disease were subsequently treated with anti-PD-1 therapy and experienced  
390 complete tumor regression. The long peptide vaccines elicited expansion of the repertoire of  
391 neoantigen-specific T cells in each patient, but most were CD4<sup>+</sup> T cells rather than CD8<sup>+</sup> T  
392 cells. In this study, 31 short peptides of SARS-CoV-2 CD8<sup>+</sup> T cell epitope (with the length of  
393 9-10 amino acids) were synthesized and mixed with R848, poly (I:C) or PLGA-NPs followed  
394 by immunizations in HLA-A2/DR1 transgenic mice and WT mice. The resulting data, for the  
395 first time to our knowledge, provide the experimental evidences that human MHC class I  
396 molecule-restricted short peptide cocktail vaccines can induce robust SARS-CoV2 specific  
397 CD8<sup>+</sup> T cell responses *in vivo*.

398 Using patients' PBMCs could only test whether the candidate peptide can be recognized  
399 by memory T cells *ex vivo*, while using healthy donor' PBMCs only test whether the  
400 candidate peptides can elicit naïve T cells *in vitro*. Whether the candidate peptide is also able  
401 to activate naïve T cells *in vivo* is a better criterion to judge it as an ideal vaccine candidate  
402 peptide. As compared with the Ad5-ACE2-transduced and SARS-CoV-2-infected BALB/c  
403 and C57BL/6 mice<sup>21</sup>, HLA transgenic mice integrated with human HLA class I and II alleles

404 are more suitable for preclinical study of the vaccine. HLA-A\*02:01 is one of the most  
405 common HLA class I alleles in the world, thus HLA-A\*02:01 transgenic mice (HHD mice)  
406 have been generally used in identifying HLA-A0201-restricted epitopes and in evaluating  
407 peptide vaccines<sup>41-43</sup>. Herein, the HLA-A0201<sup>+/+</sup>/DR1<sup>+/+</sup>/H-2- $\beta$ 2m<sup>-</sup>/IA $\beta$ <sup>-</sup> C57BL/6 mice  
408 were used in which the 9-mer or 10-mer peptides cocktail vaccines only can be presented by  
409 HLA-A2 or DR1 molecules, not by any H-2<sup>b</sup> molecules, which indicated that this mouse  
410 model is more suitable to mimic the in-human antigen procession and presentation  
411 mechanism, without the interference caused by mouse H-2 molecules presentation. However,  
412 similar to the DC-peptide-PBL co-culture system, the detailed *in vivo* mechanism by which  
413 the exogenous 9 or 10-mer peptides elicit naive CD8<sup>+</sup> T cells activation remains unclear.

414 The 120 CD8<sup>+</sup> T cell epitopes spread across the E, M, N, S, and RdRp proteins of  
415 SARS-CoV-2 with a bias distribution. Notably, the shortest E protein presented the highest  
416 density of CD8<sup>+</sup> T cell epitope (2.400/10aa), two times relative to M protein (1.216/10aa),  
417 while N, S and RdRp proteins exhibited a similar low density (0.286, 0.283, 0.290 per 10aa)  
418 in this study. These data are discriminated with other findings in which T cell epitopes  
419 relatively equally distributed across the proteome of SARS-CoV-2<sup>9</sup>.

420 Of the unexposed cohorts from the United States, Netherlands, Germany, Singapore,  
421 and United Kingdom, 20-50% could detect specific memory CD4<sup>+</sup> T cells that showed  
422 cross-reactivity to SARS-CoV-2 antigens, but the frequency was about 10 times lower (0.1%  
423 vs.1%) than that of those infected with SARS-CoV-2, presumably due to the common T cell  
424 epitopes between SARS-CoV-2 and common-cold HCoVs<sup>8, 9, 30, 44</sup>. In addition, long-lasting  
425 memory T cells reactive to N protein of SARS-CoV can be detected in 2020 in the

426 convalescent individuals with a history of SARS-CoV infection in 2003, and showed robust  
427 cross-responses against N protein of SARS-CoV-2<sup>10</sup>. In this study, depending on the sequence  
428 homologous alignment of SARS-CoV-2 with SARS-CoV, common-cold HCoVs, and current  
429 mutant variants of SARS-CoV-2, most epitopes (110) were common CD8<sup>+</sup> T cell epitopes of  
430 SARS-CoV. Additionally, 15, 6, 14 and 12 epitopes were also highly homologous (0-2 amino  
431 acids deviation) with OC43, NL63, HKU1, and 229E, respectively, which are mainly derived  
432 from in RdRp protein (39/47). These theoretical data support the previous findings in  
433 unexposed humans, but are contradictory with the previous research in which CD8<sup>+</sup> T cells  
434 generally do not cross-react with epitopes in the four common cold HCoVs<sup>29</sup>. Further  
435 detection using these homologous epitope peptides in unexposed cohort is needed. More  
436 importantly, of which 120 validated CD8<sup>+</sup> T cell epitopes of SARS-CoV-2, only 4 epitopes  
437 from S protein displayed one amino acid distinct from the five wide-spread virus variants  
438 while the one amino acid deviation at position 1, 3, 5 or 6 may or may not change epitope  
439 immunogenicity, suggesting the advantage of T cell epitope cocktail vaccine over the B cell  
440 epitope vaccine producing neutralizing antibody on the antiviral protections against mutant  
441 SARS-CoV-2.

442 In summary, 120 kinds of CD8<sup>+</sup> T cell epitopes derived from E, M, N, S, and RdRp  
443 proteins of SARS-CoV-2 and restricted by a series of high-frequency HLA-A allotypes were  
444 identified and validated. Among them, 110 and 47 epitopes are highly homologous with  
445 SARS-CoV and common-cold HCoVs respectively, 4 epitopes are distinct from current  
446 variants of SARS-CoV-2 with one amino acid substitution. HLA-A2-restricted 31 epitopes  
447 were generated as short peptide cocktail vaccines and triggered robust CD8<sup>+</sup> T cell responses

448 in HLA-A2/DR1 transgenic C57BL/6 mice and wild-type C57BL/6 mice. 7 epitopes were  
449 found to be cross-presented by HLA-A2 and H-2K/D<sup>b</sup> molecules. Whether these CD8<sup>+</sup> T cell  
450 responses elicited by the peptides could facilitate virus clearance will be studied further.

451

## 452 **Materials and methods**

### 453 **1. Preparation of PBMCs and HLA-A gene typing**

454 The white blood cell filter trays after red blood cells preparation of healthy blood donors were  
455 gotten from Blood Component Preparation Section of Jiangsu Province Blood Center. Then  
456 white blood cells were collected from the white blood cell filter tray and PBMCs were  
457 isolated by density-gradient centrifugation using Ficoll-Paque. The fresh PBMCs were either  
458 used directly or cryopreserved in -80 °C until further test. HLA-A alleles were identified by  
459 PCR-sequencing-based typing. The human samples collection and use has been approved by  
460 Clinical Ethics Committee of Affiliated Zhongda hospital of Southeast University.

### 461 **2. Mice**

462 Female HLA-A\*02:01/DR1 transgenic and H-2-β<sub>2</sub>m<sup>-/-</sup>/IAβ<sup>-/-</sup> C57BL/6 mice at 10 weeks were  
463 generous gifts from Academy of Military Medical Sciences. Female C57BL/6 mice at 10  
464 weeks of age were purchased from the Comparative Medicine Center of Yangzhou University  
465 (Yangzhou, China). Mice were maintained at the specific pathogen-free Animal Centre of  
466 Southeast University (Nanjing, China). Animal welfare and experimental procedures were  
467 performed in accordance with the Guide for the Care and Use of Laboratory Animals  
468 (Ministry of Science and Technology of China, 2006) and were approved by the Animal  
469 Ethics Committee of Southeast University.

### 470 **3. On-silicon prediction of T cell epitopes and peptide synthesis**

471 T cell epitopes spanning E, M, N, S, and RdRP proteins of SARS-CoV-2 (Wuhan strain) and  
472 presented by different HLA-A molecules were on-silicon predicted using five epitope  
473 predication tools and seven types of algorithms (IEDB-ANN, IEDB-SMM, SYFPEITHI,  
474 EPIJEN, NetMHC and ConvMHC). For each HLA-A molecule and for each protein, one to  
475 twenty 9-mer or 10-mer peptides with the highest score (highest affinity) as predicted by at  
476 least two tools were selected as candidate epitopes to be identified. The peptides were  
477 synthesized from China Peptides Co., Ltd with a purity above 95% defined by HPLC  
478 purification and mass spectrometry, and were used in cellular functional experiments.  
479 Lyophilized peptides were reconstituted at a stock concentration of 2mg/mL in DMSO-PBS  
480 solution.

### 481 **4. DC-peptide-PBL co-culture experiment**

482 Fresh PBMCs were suspended in serum-free RPMI 1640 and were allowed to adhere to  
483 culture flask for 2 hours in 5% CO<sub>2</sub> at 37°C. Non-adherent cells (PBLs) were then removed  
484 and were cryopreserved at -80°C until further use. The resulting adherent cells were cultured  
485 in RPMI 1640 with 10% FCS, 1% penicillin/streptomycin, recombinant human GM-CSF  
486 (rhGM-CSF, 1000IU/mL, PreproTech) and recombinant human IL-4 (rhIL-4, 500IU/mL,  
487 PreproTech). At day 3 and day 5, half of the medium was replaced with fresh complete  
488 medium containing the cytokines with the same final concentration detailed above. At day 5,  
489 LPS (1µg/mL, sigma) was added to induce mature DCs (mDCs). At day 7, mature DCs  
490 (mDCs) were collected and were identified by flow cytometry (FACS Calibur, BD Bioscience)  
491 with FITC-labeled anti-CD83, anti-CD80, anti-CD86, anti-HLA-DR and PE-labeled

492 anti-HLA-ABC and anti-CD1a, respectively. mDCs were incubated with single peptide  
493 (20 $\mu$ g/mL, which corresponding to the HLA-A allele of indicated healthy donor) in serum  
494 free RPMI 1640 in 48-well plate ( $5 \times 10^4$  cells/well) for four hours in 5% CO<sub>2</sub> at 37°C, then the  
495 PBLs from the same donor (recovered one day ago, and pre-labeled with CFSE or not) were  
496 added into the well ( $1 \times 10^6$  cells/well) for further 14-day co-culture. Recombinant human IL-2  
497 (20 IU/mL) was added at day 11. At day 14, the corresponding peptide (20 $\mu$ g/mL) was added.  
498 At day 17, rhIL-2 was added again (10 IU/ mL). At day 21, cells were harvested and followed  
499 by ICS or T cell proliferation assay.

#### 500 **5. Intracellular IFN- $\gamma$ staining of stimulated T cells**

501 Cells from the DC-peptide-PBL co-cultures were harvested and coincubated with  
502 corresponding peptide (20 $\mu$ g/mL) or no peptide (negative control) for 16 hours in serum- free  
503 RPMI-1640 medium in 48-well plate at 37°C and 5% CO<sub>2</sub>. After that, BFA/Monensin mixture  
504 was added to the cells for another 6 hours culture. Cells were then harvested, washed, blocked  
505 with human FcR Blocking Reagent (MACS) for 20 min at 4°C and were stained with  
506 FITC-labeled anti-CD3 and APC-labeled anti-CD8 antibodies for 30 min at 4 °C. After  
507 washing, cells were fixed and permeabilized following the protocol and were further  
508 incubated with PE-anti-human IFN- $\gamma$  (4S.B3) (BD) for another 30 min at 4°C followed by  
509 flow cytometry. The frequencies of IFN- $\gamma$ <sup>+</sup> cells in CD3<sup>+</sup>/CD8<sup>+</sup> populations were calculated.

#### 510 **6. CD8<sup>+</sup> T cell proliferation assay**

511 In the DC-peptide-PBL co-culture, PBLs were pre-stained with CFSE. Briefly, PBLs were  
512 thawed, washed, and labeled with CFSE at a final concentration of 1.5 $\mu$ M for 20 min at 37°C.  
513 After washing, the CFSE-pre-labeled PBLs were seeded into DC-peptide-PBL co-culture well

514 and incubated for 14 days. At day 22, cells were harvested and blocked with human FcR  
515 Blocking Reagent (MACS) for 20 min, then stained with PE-labeled anti-CD3 and  
516 APC-labeled anti-CD8 antibodies for 30 min at 4°C for further analysis on the flow cytometry.  
517 The proliferation percentage of CD8<sup>+</sup> T cells in CD3<sup>+</sup>/CD8<sup>+</sup> population was analyzed  
518 according to the reduction of CFSE-staining brightness.

### 519 **7. Generation of HMy2.CIR cell lines expressing indicated HLA-A molecule**

520 Total mRNA was extracted from the PBMCs of the healthy donor with indicated HLA-A  
521 alleles, the cDNA of each HLA-A allele was amplified using PCR and followed by the routine  
522 construction of pcDNATM3.1/myc-His(-)A recombinant plasmid. After electrotransfection,  
523 the cell lines stably expressing indicated HLA-A molecule was screened by G418. Then the  
524 cell lines were stained with fluorescence-labeled monoclonal antibody W6/32 against  
525 HLA-ABC or anti-HLA-A24, the high-expression cells were then sorted using flow  
526 cytometry and followed by pure culture and sequencing analyses.

### 527 **8. HLA-A molecule competitive binding assay**

528 A set of plasmid-transfected HMy2.CIR cell lines expressing indicated HLA-A molecule were  
529 generated in house and sorted by flow cytometry. The cell lines were then used in the  
530 competitive peptide binding assay according to the references<sup>45</sup>. Briefly, the CIR cell lines  
531 expressing indicated HLA-A molecule were washed with acid buffer (0.131M citric acid and  
532 0.061M sodium phosphate Na<sub>2</sub>HPO<sub>4</sub>, PH3.3, 0.22µm filtered) for 1 min, and then neutralized  
533 by IMDM medium containing 0.5%BSA. Cells were washed, seeded into 96-well U culture  
534 plate (1×10<sup>5</sup> cells/100µL/well) with β<sub>2</sub>-m (1µg/mL). Then 25µL unlabeled peptide to be tested  
535 (5µM or 15µM) and 25µL fluorescent-labeled reference peptide (300nM) were added into the



536 well and coincubated for 24h at 4°C. The reference peptides used in this research were  
537 FLPSDK(FITC)FPSV (for HLA-A0201, A0203 and A0206), YVNVNK(FITC)GLK (for  
538 HLA-A1101 and A3303), EYLVSK(FITC)GVW (for A2402), YLEPAK(FITC)AKY (for  
539 A0101) and ASRELK(FITC)VSY (for A3001). The plate was centrifuged at 600rpm for 5min  
540 at room temperature (RT). Cells were washed twice with 100µL cold 0.5% BSA-PBS. Finally,  
541 cells were resuspended with 150µL PBS and transferred to the flow tube and further analyzed  
542 with flow cytometry. Fluorescence polarization (FP) <sub>sample</sub> is the FP value for the sample,  
543 while the minimum FP<sub>free</sub> is the FP value for free FITC-labeled reference peptide, and the  
544 maximum reaction FP<sub>no</sub> is the FP value for FITC-labeled reference peptide without  
545 unlabeled competitor peptide. Competitive binding (%) =  $[1 - (FP_{\text{sample}} - FP_{\text{free}}) / (FP_{\text{no}} - FP_{\text{free}})] \times 100\%$ . IC<sub>50</sub> is the concentration of unlabeled peptide required to inhibit the  
546 binding of labeled reference peptide by 50%, which is calculated from the competitively  
547 binding inhibition (%) of the sample at 5µM and 15µM. Binding affinity of unlabeled peptide  
548 with indicated HLA-A molecule is assessed by IC<sub>50</sub>. IC<sub>50</sub> < 5µM means high binding affinity,  
549 between 5-15µM means intermediate binding affinity, more than 15µM means low binding  
550 affinity or no binding affinity.

## 552 **9. Preparation of peptide pools for vaccine immunization**

553 Validated antigenic peptides restricted by HLA-A2 molecules (including A0201, A0203,  
554 A0206, A0207) were reconstituted in ideal solution before use at a final concentration of  
555 5mg/mL for vaccine immunization and 2mg/mL for T cell response detection. Totally 31  
556 antigenic peptides (9-mer or 10-mer) were grouped into four pools (pool-v1 to v4) for vaccine  
557 immunization ([Table S3](#)). For IFN-γ-ELISPOT assay, the 31 antigenic peptides were grouped

558 into eight pools according to their derived protein and the feature of acid and alkalinity (Table  
559 S3). For IFN- $\gamma$  ICS and ELISA, the 31 antigenic peptides were grouped into five pools  
560 according to their derived proteins (Table S3).

#### 561 **10. T2 cell binding assay**

562 To assess the affinity of HLA-A2-restricted epitope peptides with HLA-A0201 molecule,  
563 peptide-induced up-regulation of HLA-A0201 expression on T2 cells was measured. Briefly,  
564 T2 cells were incubated with single peptide of the 31 epitopes (50 $\mu$ g/mL) or CMVpp65<sub>495-503</sub>  
565 peptide (NLVPMVATV, 50 $\mu$ g/mL, as positive control) or OVA<sub>257-264</sub> peptide (SIINFKEL,  
566 50 $\mu$ g/mL, as negative control) or no peptide and 3 $\mu$ g/mL  $\beta$ 2-m for 16 hours at 37 °C and 5%  
567 CO<sub>2</sub>. Then T2 cells were stained with PE-labeled anti-HLA-A2.1 antibody for 30 min at 4 °C  
568 followed by flow cytometry. The fluorescence index (FI) was calculated as follows: FI =  
569 (mean PE fluorescence with the given peptide - mean PE fluorescence without peptide)/  
570 (mean PE without peptide). FI > 0.5 was the criteria of peptides with affinity while peptides  
571 with FI > 1 were regarded as high-affinity epitopes. FI  $\leq$  0.5 means low affinity or no binding.

#### 572 **11. Preparation of PLGA-NPs/peptides vaccine**

573 Peptides-encapsulated PLGA-NPs were prepared freshly using the double-emulsion solvent  
574 evaporation method. To equal the amount of peptides in PLGA-NPs/peptides vaccine to the  
575 PolyI:C/peptides vaccine and R848/peptides vaccine, the loading efficiency of the PLGA-NPs  
576 was calculated before vaccination, then the PLGA-NPs carrying single peptide pool were  
577 prepared for future injections (one injection/mouse, 3 mice). Briefly, 60 mg of PLGA with or  
578 without single peptide pool (575 $\mu$ g/pool, 72-82  $\mu$ g/peptide) was dissolved in 15mL of  
579 dichloromethane followed by ultrasonic dispersion for 30s at 40% amplitude to get the

580 primary emulsion. Then, the primary emulsion was added into 150mL of 1% polyvinyl  
581 alcohol and sonicated for another 90 s to form the secondary emulsion. The resulting  
582 emulsion was added into 300mL of 0.5% PVA solution drop by drop with incessant magnetic  
583 stir to allow the evaporation of the dichloromethane. Four hours later, the solution was  
584 collected and centrifuged at 6,000 rpm for 5 min. The supernatant was harvested and was  
585 ultracentrifuged twice at 12,000 rpm for 10 min. The resulting PLGA-NPs were dispersed in  
586 deionized water and were further mixed with EDC and NHS solution for 1 h to allow surface  
587 activation of –COOH. After washing, the solution was added dropwise in 1% PEI with a  
588 magnetic stirrer for 4 hours at RT. Then, PEI-conjugated NPs were then collected and  
589 coincubated with single peptide pool (575µg/pool, 72-82 µg/peptide) in sterile PBS overnight  
590 at 4°C on a rotator. Finally, the peptides-encapsulated and - surface coupled  
591 PLGA-NPs/peptides vaccine was collected and preserved at 4 °C for further use.

## 592 **12. Preparation of Poly I:C/peptides and R848/peptides vaccines and mice immunization**

593 At day 0, mice were injected subcutaneously as the primary immunization. After that, booster  
594 immunizations were applied at day 7 and 21. At day 28, mice were executed for further study.  
595 The amount of each peptide for each inoculation was 10µg/mouse per time point, so, the  
596 amount of each peptide pool was 70 or 80µg/mouse/time point. Each mouse was inoculated  
597 with four peptide pools per time point. Each peptide pool was inoculated at one injection site  
598 (subcutaneously at tail root, back of the neck and around the groin). Twelve female  
599 HLA-A2/DR1 transgenic mice were randomly divided into four groups. The immunization  
600 groups, vaccines formula and vaccination scheme were described in [Table S4](#).

## 601 **13. ELISPOT and ICS**

602 96-well PVDF-membrane microplates (Merck&Millipore) were coated with anti-IFN- $\gamma$   
603 capture monoclonal antibody (BD) at 4°C overnight, and were washed and blocked. Spleen  
604 cells ( $2 \times 10^5/100\mu\text{L}$ ) of primed mice were added into each well, together with single peptide  
605 pool ( $2\mu\text{g}/\text{well}$  for each peptide), PHA ( $10\mu\text{g}/\text{mL}$  as positive controls), irrelevant epitope  
606 peptides (HLA-A2-restricted AFP<sub>158-166</sub> and A24-restricted AFP<sub>424-432</sub>,  $2\mu\text{g}/\text{well}$  for each  
607 peptide as no-specific control) or no peptide (negative control). After incubation for 20 h at  
608 37 °C and 5% CO<sub>2</sub>, the plates were washed and then incubated with biotinylated anti-IFN- $\gamma$   
609 detecting antibody (BD) for 2h at RT. The plates were washed and then incubated with the  
610 streptavidin-conjugated HRP (BD) for 1h at RT. After washing the plates, AEC solution (BD)  
611 was used as the color developing agent and the developed spots were imaged and enumerated  
612 with professional plate reader.

613 Additionally, Spleen cells of primed mice were incubated with single peptide pool  
614 ( $20\mu\text{g}/\text{mL}$  for each peptide), PHA ( $10\mu\text{g}/\text{mL}$ ), irrelevant epitope peptides (AFP<sub>158-166</sub> and  
615 AFP<sub>424-432</sub>,  $20\mu\text{g}/\text{mL}$  for each peptide) or no peptide for 16 hours in serum-free RPMI-1640  
616 medium in 48-well plate at 37°C and 5% CO<sub>2</sub>. After that, BFA/Monensin mixture was added  
617 to the cells for another 6-hour culture. Cells were then harvested, washed, blocked with  
618 anti-mouse CD16/CD32 for 20 minutes at 4°C and were stained with FITC-labeled anti-CD3  
619 and PE-labeled anti-CD8 antibodies for 30 min at 4 °C. After washing, cells were fixed and  
620 permeabilized following the protocol and were further incubated with APC-anti-mouse IFN- $\gamma$   
621 (XMG1.2) (BD) for another 30 min at 4°C followed by flow cytometry. The frequencies of  
622 IFN- $\gamma^+$  cells in CD3<sup>+</sup>/CD8<sup>+</sup> populations were calculated.

623 14. **ELISA**

624 Spleen cells were incubated with single peptide pool (16µg/mL for each peptide) or no  
625 peptide (negative control) in 48-well plate for 3 days at 37°C and 5% CO<sub>2</sub>. Then, the  
626 supernatants were collected for ELISA. The mouse IFN-γ detection ELISA kit (Dakewe,  
627 China) was used to quantify the IFN-γ in supernatants according to manufacturer's protocol.

## 628 **15. Hematoxylin-eosin staining**

629 28 days after primary immunization, the heart, liver, lung and kidney from executed mice  
630 were immersed in 4% paraformaldehyde overnight. After that, individual lobes of organs'  
631 biopsy material were placed in processing cassettes, dehydrated through a serial alcohol  
632 gradient, and embedded in paraffin wax blocks. 5-µm-thick tissue sections were dewaxed in  
633 xylene, rehydrated through decreasing concentrations of ethanol, and washed in PBS. Then  
634 hematoxylin and eosin staining was carried out routinely.

635

## 636 **Acknowledgement**

637 This work was supported by National Nature Science Foundation of China (82041006) and  
638 COVID-19 Emergency Research Fund of Zhejiang University of China (2020XGZX021).  
639 The sponsors had no role in study design, data collection and analysis, preparation of the  
640 manuscript, or decision to submit the article for publication.

641

## 642 **Author Contributions**

643 C.S., Y.H. and G.Z. designed and supervised the research. X.J. and Y.D. performed the main  
644 experiments of this study. S.S. performed the transgenic mice experiments. X.W. and Z.Z.  
645 assisted in the PBMC preparation, cell cultures and flow cytometry and consequent data

646 analysis. X.L. performed the HLA genotyping and assisted in the generation of HMy2.CIR  
647 cell lines expressing indicated HLA-A allotypes. A.S and Y.W assisted in the preparation of  
648 peptide cocktail vaccines and mice immunizations. M.L. and X.C collected healthy donors'  
649 blood samples and separated the PBMCs. J.L. and B.L. assisted in the on-silicon prediction of  
650 epitopes and affinity analysis with HLA-A molecules. C.S. and X.J. wrote the manuscript  
651 with discussions from all authors. Y.H., J. Z and H.Q. analyzed and organized the whole data  
652 and assisted in the revision of manuscript.

653

#### 654 **Conflict of Interests**

655 The authors declare no competing financial interests related to this study.

656

#### 657 **References**

- 658 1. Reche, P. A. Potential Cross-Reactive Immunity to SARS-CoV-2 From Common Human  
659 Pathogens and Vaccines. *Front. Immunol.* **11**, 586984 (2020).
- 660 2. Chen, Z. et al. T and B cell Epitope analysis of SARS-CoV-2 S protein based on  
661 immunoinformatics and experimental research. *J. Cell. Mol. Med.* **25**, 1274-1289 (2021).
- 662 3. Jeyanathan, M. et al. Immunological considerations for COVID-19 vaccine strategies.  
663 *Nat. Rev. Immunol.* **20**, 615-632(2020).
- 664 4. Krammer, F. SARS-CoV-2 vaccines in development. *Nature* **586**, 516-527 (2020).
- 665 5. Addetia, A. et al. Neutralizing Antibodies Correlate with Protection from SARS-CoV-2 in  
666 Humans during a Fishery Vessel Outbreak with a High Attack Rate. *J. Clin. Microbiol.* **58**,  
667 e02107-02120 (2020).

- 668 6. Long, Q. X. et al. Clinical and immunological assessment of asymptomatic SARS-CoV-2  
669 infections. *Nat. Med.* **26**, 1200-1204 (2020).
- 670 7. Schmidt, M. E. et al. The CD8 T Cell Response to Respiratory Virus Infections. *Front.*  
671 *Immunol.* **9**, 678 (2018).
- 672 8. Braun, J. et al. SARS-CoV-2-reactive T cells in healthy donors and patients with  
673 COVID-19. *Nature* **587**, 270-274 (2020).
- 674 9. Grifoni, A. et al. Targets of T Cell Responses to SARS-CoV-2 Coronavirus in Humans  
675 with COVID-19 Disease and Unexposed Individuals. *Cell* **181**, 1489-1501 (2020).
- 676 10. Le, B. N. et al. SARS-CoV-2-specific T cell immunity in cases of COVID-19 and SARS,  
677 and uninfected controls. *Nature* **584**, 457-462 (2020).
- 678 11. Peng, Y. et al. Broad and strong memory CD4(+) and CD8(+) T cells induced by  
679 SARS-CoV-2 in UK convalescent individuals following COVID-19. *Nat. Immunol.* **21**,  
680 1336-1345 (2020).
- 681 12. Sekine, T. et al. Robust T Cell Immunity in Convalescent Individuals with Asymptomatic  
682 or Mild COVID-19. *Cell* **183**, 158-168 (2020).
- 683 13. Xu, Z. et al. Pathological findings of COVID-19 associated with acute respiratory distress  
684 syndrome. *The Lancet. Respiratory. Medicine.* **8**, 420-422 (2020).
- 685 14. Wang, F. et al. Characteristics of Peripheral Lymphocyte Subset Alteration in COVID-19  
686 Pneumonia. *J. Infect. Dis.* **221**, 1762-1769 (2020).
- 687 15. Jiang, Y. et al. COVID-19 pneumonia: CD8(+) T and NK cells are decreased in number  
688 but compensatory increased in cytotoxic potential. *Clin. Immunol.* **218**, 108516 (2020).
- 689 16. Rodriguez, L. et al. Systems-Level Immunomonitoring from Acute to Recovery Phase of

- 690 Severe COVID-19. *Cell. Rep. Med.* **1**, 100078 (2020).
- 691 17. Mathew, D. et al. Deep immune profiling of COVID-19 patients reveals distinct  
692 immunotypes with therapeutic implications. *Science* **369**, 6508 (2020).
- 693 18. Meckiff, B. J. et al. Imbalance of Regulatory and Cytotoxic SARS-CoV-2-Reactive  
694 CD4(+) T Cells in COVID-19. *Cell* **183**, 1340-1353 (2020).
- 695 19. Zhang, J. Y. et al. Single-cell landscape of immunological responses in patients with  
696 COVID-19. *Nat. Immunol.* **21**, 1107-1118 (2020).
- 697 20. Sauer, K. et al. An Effective COVID-19 Vaccine Needs to Engage T Cells. *Front.*  
698 *Immunol.* **11**, 581807 (2020).
- 699 21. Zhuang, Z. et al. Mapping and role of T cell response in SARS-CoV-2-infected mice. *J.*  
700 *Exp. Med.* **218**, e20202187 (2021).
- 701 22. Anand, R. et al. Computational perspectives revealed prospective vaccine candidates from  
702 five structural proteins of novel SARS corona virus 2019 (SARS-CoV-2). *PeerJ* **8**, e9855  
703 (2020).
- 704 23. Saha, R. et al. Designing a next generation multi-epitope based peptide vaccine candidate  
705 against SARS-CoV-2 using computational approaches. *3. Biotech.* **11**, 47 (2021).
- 706 24. Singh, H. et al. Designing spike protein (S-Protein) based multi-epitope peptide vaccine  
707 against SARS COVID-19 by immunoinformatics. *Heliyon* **6**, e05528 (2020).
- 708 25. Behmard, E. et al. Immunoinformatic design of a COVID-19 subunit vaccine using entire  
709 structural immunogenic epitopes of SARS-CoV-2. *Sci. Rep.* **10**, 20864 (2020).
- 710 26. Banerjee, S. et al. Immuno-informatics approach for multi-epitope vaccine designing  
711 against SARS-CoV-2. bioRxiv



- 712 <https://www.biorxiv.org/content/10.1101/2020.07.23.218529v3> (2020).
- 713 27. Noorimotlagh, Z. et al. Immune and bioinformatics identification of T cell and B cell  
714 epitopes in the protein structure of SARS-CoV-2: A systematic review. *Int.*  
715 *Immunopharmacol.* **86**, 106738 (2020).
- 716 28. Cun, Y. et al. COVID-19 coronavirus vaccine T cell epitope prediction analysis based on  
717 distributions of HLA class I loci (HLA-A, -B, -C) across global populations. *Hum. Vaccin.*  
718 *Immunother.* **17**, 1097-1108 (2021).
- 719 29. Ferretti, A. K. et al. Unbiased Screens Show CD8+ T Cells of COVID-19 Patients  
720 Recognize Shared Epitopes in SARS-CoV-2 that Largely Reside outside the Spike Protein.  
721 *Immunity* **53**, 1095-1107 (2020).
- 722 30. Mateus, J. G. et al. Selective and cross-reactive SARS-CoV-2 T cell epitopes in unexposed  
723 humans *Science* **370**, 89-94 (2020).
- 724 31. Prachar, M. et al. Identification and validation of 174 COVID-19 vaccine candidate  
725 epitopes reveals low performance of common epitope prediction tools. *Sci. Rep.* **10**,  
726 20465 (2020).
- 727 32. Kared, H. et al. SARS-CoV-2-specific CD8+ T cell responses in convalescent COVID-19  
728 individuals. *J. Clin. Invest.* **131**, e145476 (2021).
- 729 33. Rydyznski, M. C. Antigen-Specific Adaptive Immunity to SARS-CoV-2 in Acute  
730 COVID-19 and Associations with Age and Disease Severity. et al. *Cell* **183**, 996-1012  
731 (2020).
- 732 34. Tang, F. et al. Lack of peripheral memory B cell responses in recovered patients with  
733 severe acute respiratory syndrome: a six-year follow-up study. *J. Immunol.* **186**,

- 734 7264-7268 (2011)
- 735 35. Channappanavar, R. et al. Virus-specific memory CD8 T cells provide substantial  
736 protection from lethal severe acute respiratory syndrome coronavirus infection. *J. Virol.*  
737 **88**, 11034-11044 (2014).
- 738 36. Alcazer, V. et al. Neoepitopes-based vaccines: challenges and perspectives. *Eur. J. Cancer.*  
739 **108**, 55-60 (2019).
- 740 37. Sahin, U. T. Personalized vaccines for cancer immunotherapy. *Science* **359**, 1355-1360  
741 (2018).
- 742 38. Ott, P. A. et al. An immunogenic personal neoantigen vaccine for patients with melanoma.  
743 *Nature* **547**, 217-221 (2017).
- 744 39. Sahin, U. et al. Personalized RNA mutanome vaccines mobilize poly-specific therapeutic  
745 immunity against cancer. *Nature* **547**, 222-226 (2017).
- 746 40. Li, F. et al. Rapid tumor regression in an Asian lung cancer patient following personalized  
747 neo-epitope peptide vaccination. *Oncoimmunology* **5**, e1238539 (2016).
- 748 41. Wang, B. et al. Identification of an HLA-A\*0201-restricted CD8+ T-cell epitope SSp-1 of  
749 SARS-CoV spike protein. *Blood* **104**, 200-206 (2004).
- 750 42. Lacey, S. F. et al. Characterization of immunologic properties of a second HLA-A2  
751 epitope from a granule protease in CML patients and HLA-A2 transgenic mice. *Blood* **118**,  
752 2159-2169 (2011).
- 753 43. Takagi, A. et al. Identification of HLA-A\*02:01-restricted candidate epitopes derived  
754 from the non-structural polyprotein 1a of SARS-CoV-2 that may be natural targets of  
755 CD8(+) T cell recognition in vivo. *J. Virol.* **Dec 2**, 01837-20 (2020).

756 44. Weiskopf, D. et al. Phenotype and kinetics of SARS-CoV-2-specific T cells in COVID-19  
757 patients with acute respiratory distress syndrome. *Sci. Immunol.* **5**, eabd2071 (2020).

758 45. Tsuboi, A. et al. Enhanced induction of human WT1-specific cytotoxic T lymphocytes  
759 with a 9-mer WT1 peptide modified at HLA-A\*2402-binding residues. *Cancer. Immunol.*  
760 *Immunother.* **51**, 614-620 (2002).

761

762 Supplementary information is available at Cellular and Molecular Immunology's website.

763

#### 764 **Figure legends**

765 **Figure 1: Reference epitope peptides were tested in the DC-peptide-PBL co-culture**  
766 **system.** The HLA-A restricted HCC 1-1, HCC 1-2, HCC 5-3, HCC 5-4, HCC 5-5, HBV 111  
767 and HBV 118 peptides, which have been validated as real-world epitopes previously in-house  
768 by using HCC patients' or chronic hepatitis patient's PBMCs and ELISPOT assay, were  
769 co-cultured with DC and PBLs from healthy donor's PBMCs for 14 days. As detected by both  
770 IFN- $\gamma$  ICS and CFSE proliferation analyses, the weak positive reference peptides (HCC 1-1  
771 and HCC 1-2, SFUs/ $2 \times 10^5$  PBMCs  $< 10$ ) were defined as negative peptides while other  
772 positive reference peptides (SFUs/ $2 \times 10^5$  PBMCs  $> 15$ ) were identified as immunogenic  
773 epitope peptides. The frequency of IFN- $\gamma^+$  T cells in CD3<sup>+</sup>/CD8<sup>+</sup> T cell population increased  
774 by more than 100% and proliferation percentage of CD8<sup>+</sup> T cells in CD3<sup>+</sup>/CD8<sup>+</sup> T cell  
775 population increased by more than 20%, as compared with the no peptide negative control.

776 **Figure 2: Immunogenicity of candidate epitopes was validated by DC-peptide-PBL**  
777 **co-culture experiments.** DCs were induced for 7 days from healthy donor's PBMCs, then

778 coincubated with candidate epitope peptides and autologous PBLs for 14 days. Cells were  
779 harvested and stimulated by corresponding candidate peptides for another 16 hours followed  
780 by IFN- $\gamma$  ICS. In some co-culture wells, the DC and peptides were co-cultured with  
781 CFSE-prelabeled PBLs for 14 days, and cells were then harvested to detect the proliferation  
782 percentage of CD8<sup>+</sup> T cell. (A) Representative flow plots of IFN- $\gamma$  ICS. The data in horizontal  
783 coordinates mean the frequency of IFN- $\gamma$ <sup>+</sup> T cells in CD3<sup>+</sup>/CD8<sup>+</sup> T cell population. (B)  
784 Representative flow plots of CFSE staining. The data in horizontal coordinates mean the  
785 proliferation percentage of CD8<sup>+</sup> T cells in CD3<sup>+</sup>/CD8<sup>+</sup> T cell population.

786 **Figure 3: T cell epitope peptide cocktail vaccines elicited robust CD8<sup>+</sup> T cell responses in**  
787 **transgenic mice.** 31 positive epitope peptides restricted by HLA-A2 molecule were used to  
788 generate peptide cocktail vaccines in three formulations, and followed by three-round  
789 immunizations of HLA-A2/DR1 transgenic C57BL/6 mice. Then, splenocytes were collected  
790 7 days after the last booster and *ex vivo* stimulated with distinct peptide pools according to  
791 single protein overnight, followed by IFN- $\gamma$  ELISPOT and IFN- $\gamma$  ICS. (A) Total IFN- $\gamma$  SFUs  
792 responding to all peptide pools in each mouse. (B) Deconvolution of the total SFUs in each  
793 mouse from A into the single SARS-CoV-2 proteins. (C) Total frequency of IFN- $\gamma$ <sup>+</sup> T cells  
794 reacting to all peptide pools in CD3<sup>+</sup>CD8<sup>+</sup> T cell population in each mouse. (D)  
795 Deconvolution of the total frequency in each mouse from C into the single SARS-CoV-2  
796 proteins. Control group: N.S and PLGA-NPs; Vaccine A group: PLGA-NPs/peptides vaccines;  
797 Vaccine B group: R848/peptides vaccines; Vaccine C group: poly I: C/peptides vaccines.

798 **Figure 4: IFN- $\gamma$  ELISPOT responses against the individual peptide pools.** Splenocytes  
799 from each primed mouse were harvested 7 days after the last booster and *ex vivo* stimulated

800 with 8 different peptide pools covering the 31 epitope peptides or with AFP peptides  
801 (AFP<sub>158-166</sub>, AFP<sub>424-432</sub>) as irrelevant control, or without peptide as negative control, and  
802 followed by IFN- $\gamma$  ELISPOT.

803 **Figure 5: Flow plots of IFN- $\gamma$  ICS responding to the individual peptide pools.**

804 Splenocytes from each primed mouse were harvested 7 days after the last booster and *ex vivo*  
805 stimulated with 5 different peptide pools according to single protein or with AFP peptides  
806 (AFP<sub>158-166</sub>, AFP<sub>424-432</sub>) as irrelevant control, or without peptide as negative control, and  
807 followed by IFN- $\gamma$  ICS. The data in left upper quadrant mean the frequencies of IFN- $\gamma$ <sup>+</sup> T  
808 cells in CD3<sup>+</sup>/CD8<sup>+</sup> cell populations.

809 **Figure 6: T cell epitope peptide cocktail vaccines elicited robust CD8<sup>+</sup> T cell responses as**

810 **detected by IFN- $\gamma$  ELISA in transgenic mice and by IFN- $\gamma$  ICS in WT mice.** Splenocytes

811 from each primed HLA-A2/DR1 transgenic C57BL/6 mice were harvested 7 days after the last  
812 booster and *ex vivo* stimulated with 5 different peptide pools according to single protein or  
813 without peptide for 3 days. Then supernatants were collected and followed by IFN- $\gamma$  ELISA.

814 (A) Total IFN- $\gamma$  level responding to all peptide pools in each mouse. (B) Deconvolution of the

815 total IFN- $\gamma$  level in each mouse from A into the single SARS-CoV-2 proteins. Similarly,

816 wild-types C57BL/6 mice were divided into two groups and were immunized three times with

817 the Poly I:C/peptides vaccines prepared using the 31 validated epitope peptides or normal

818 saline, respectively. Splenocytes were then collected 7 days after the last booster and *ex vivo*

819 stimulated with 5 different peptide pools overnight, followed by IFN- $\gamma$  ICS. (C) Total

820 frequency of IFN- $\gamma$ <sup>+</sup> T cells reacting to all peptide pools in CD3<sup>+</sup>CD8<sup>+</sup> T cell population in

821 each mouse. (D) Deconvolution of the total frequency in each mouse from C into the single

822 SARS-CoV-2 proteins.

823 **Figure 7: Flow plots of IFN- $\gamma$  ICS responding to the individual peptide pools after WT**  
824 **mice immunizations.** (A) Splenocytes from each primed WT mouse were harvested 7 days  
825 after the last booster and *ex vivo* stimulated with 5 different peptide pools according to single  
826 protein or with AFP peptides (AFP<sub>158-166</sub>, AFP<sub>424-432</sub>) as irrelevant control, or without peptide  
827 as negative control, and followed by IFN- $\gamma$  ICS. The data in left upper quadrant mean the  
828 frequencies of IFN- $\gamma$ <sup>+</sup> T cells in CD3<sup>+</sup>/CD8<sup>+</sup> cell populations. (B) 7 of 31 epitopes restricted  
829 by HLA-A2 were identified to be cross-presented by H-2K/D<sup>b</sup> molecules. Splenocytes from  
830 each primed WT mouse were harvested as described and *ex vivo* stimulated with single  
831 peptide, or without peptide as negative control, and followed by IFN- $\gamma$  ICS. The epitopes  
832 were identified as immunogenic peptides when the frequency of IFN- $\gamma$ <sup>+</sup> T cells in CD3<sup>+</sup>/CD8<sup>+</sup>  
833 cell population increased by more than 100% compared with the negative control.  
834 Representative flow plots of the 7 positive epitopes were shown.

835 **Figure S1: Generation of mature mDC from adherent monocytes.** PBMCs from healthy  
836 donors were seeded into culture flask and the monocytes adhered for 2 h as described in the  
837 Methods section. After washing out the non-adherent cells in both systems, the cells were  
838 cultured for 5 days with 1,000 IU/mL GM-CSF and 500 IU/mL IL-4. Then the immature DCs  
839 were matured with 1 $\mu$ g/mL LPS for another 48 hours. Immature DCs and mature DCs were  
840 stained for CD1a, CD80, CD83, CD86, HLA-ABC and HLA-DR. The unstained and stained  
841 populations in the histograms are shown in grey and black, respectively. (A) Phenotype of  
842 immature DCs on day 5. (B) Phenotype of mature DCs on day 7.

843 **Figure S2: 120 epitopes were validated by DC-peptide-PBL co-culture experiments**

844 **(IFN- $\gamma$  ICS flow plots).** DCs were induced for 7 days from healthy donor's PBMCs, then  
845 coincubated with candidate epitope peptides and autologous PBLs for 14 days. Cells were  
846 harvested and stimulated by corresponding candidate peptides for another 16 hours followed  
847 by IFN- $\gamma$  ICS. The presented are flow plots for each positive epitope peptide. The data in  
848 horizontal coordinates mean the frequency of IFN- $\gamma$ <sup>+</sup> T cells in CD3<sup>+</sup>/CD8<sup>+</sup> T cell population.

849 **Figure S3: 120 candidate epitopes were validated by DC-peptide-PBL co-culture**  
850 **experiments (CFSE staining flow plots).** DCs were coincubated with candidate epitope  
851 peptides and CFSE-prelabeled PBLs for 14 days. Cells were then analyzed by flow cytometry.  
852 The presented are flow plots for each positive epitope peptide. The data in horizontal  
853 coordinates mean the proliferation percentage of CD8<sup>+</sup> T cells in CD3<sup>+</sup>/CD8<sup>+</sup> T cell  
854 population.

855 **Figure S4: Eight kinds of HMy2.CIR cell lines expressing one indicated HLA-A allotype.**  
856 The transfected HMy2.CIR cell lines expressing HLA-A2402, A0203, A0201, A0206, A1101,  
857 A3303, A0101, or A3001 were generated, respectively, and then sorted by flow cytometry  
858 followed by pure culture and sequencing analyses. The purity of CIR-A2402 cells was 94.1%  
859 after being sorted with FITC-anti-A24 staining. The purity of CIR-A0203 cell was 84.3%  
860 after being sorted with PE-anti-HLA-ABC (W6/32) or PE-anti-HLA-A2.1 staining. The  
861 purities of CIR-A0201/0206/1101/3303/0101/3001 were all more than 80% after being sorted  
862 with PE-anti-HLA-ABC staining.

863 **Figure S5: Binding affinity of 120 validated epitopes with HLA-A allotypes as defined by**  
864 **HLA-A molecule competitive binding experiments.** A series of unlabeled epitope peptides  
865 of SRAS-CoV-2 were coincubated, at 5 $\mu$ M and 15 $\mu$ M respectively, with fluorescent-labeled

866 reference peptides and CIR cell lines expressing the corresponding HLA-A molecules for 24  
867 hours. Then the competitively binding inhibition (%) of the epitope peptide at 5 $\mu$ M and 15 $\mu$ M  
868 was calculated by measuring the CIR cells fluorescence strength. Shown are the histograms of  
869 two concentrations (5 $\mu$ M and 15 $\mu$ M). Black solid line was the histogram of 5 $\mu$ M test peptide;  
870 dotted line was the histogram of 15 $\mu$ M, test peptide; black filled line was the maximal  
871 fluorescence (FITC-labeled reference peptide without competitive peptides) while the lightest  
872 gray line was the negative control (background fluorescence with 1640 alone).

873 **Figure S6: Affinity of HLA-A2-restricted epitope peptides with HLA-A0201 molecule as**  
874 **detected by T2 cell binding assay.** T2 cells were incubated with single peptide of the 31  
875 epitopes, or with CMVpp65<sub>495-503</sub> peptide as positive control, OVA<sub>257-264</sub> peptide as negative  
876 control, or no peptide and  $\beta$ 2-m for 16 hours, then followed by PE-labeled anti-HLA-A2.1  
877 antibody staining to test the up-regulation of HLA-A0201 molecules onto T2 cells. The  
878 fluorescence index (FI) was calculated with flow cytometry.

879 **Figure S7: The peptide cocktail vaccines have no visible toxicity on the organs.** Seven  
880 days after the last booster, all mice were executed. Heart, liver, lung and kidney were taken  
881 out, immersed and were finally stained with Hematoxylin-Eosin. No obvious pathological  
882 damage was found in all organs in all groups. The representative HE staining of heart, liver,  
883 lung and kidney in each mouse from four groups were exhibited in (A), (B), (C) and (D),  
884 respectively.

885

886

887

888



889 Table 1: 120 SARS-CoV-2 T cell epitopes validated by DC-peptide-PBL co-stimulation  
 890 experiments.

| Epitope | On-silicon HLA-A restriction | Blood donor 1 |               |          | Blood donor 2 |               |          | Blood donor 3 |               |          |
|---------|------------------------------|---------------|---------------|----------|---------------|---------------|----------|---------------|---------------|----------|
|         |                              | A allele      | Method        | Enhance% | A allele      | Method        | Enhance% | A allele      | Method        | Enhance% |
| A1      | 0201, 0207, 0206, 2402       | 0201/6843     | CFSE          | 24.4%    | 3101/0207     | IFN- $\gamma$ | 130.0%   | 1101/0201     | IFN- $\gamma$ | 120.7%   |
| A3      | 0201, 0203, 1101, 1102       | 0201/2402     | IFN- $\gamma$ | 314.2%   |               |               |          |               |               |          |
| A4      | 0201, 0207, 0203             | 0201/3303     | IFN- $\gamma$ | 116.2%   | 6801/3303     | IFN- $\gamma$ | 436.6%   | 2402/0207     | IFN- $\gamma$ | 137.3%   |
| A5      | 0201, 0203                   | 0201/3303     | IFN- $\gamma$ | 589.2%   | 0201/3001     | IFN- $\gamma$ | 650.2%   | 6801/3303     | IFN- $\gamma$ | 728.8%   |
| A6      | 0207, 0206                   | 0206/0207     | IFN- $\gamma$ | 198.5%   | 1101/0206     | IFN- $\gamma$ | 263.0%   |               |               |          |
| A7      | 0207                         | 0206/0207     | IFN- $\gamma$ | 253.8%   |               |               |          |               |               |          |
| A9      | 0206                         | 0206/1101     | IFN- $\gamma$ | 163.2%   | 0206/0203     | IFN- $\gamma$ | 131.7%   | 1101/0206     | IFN- $\gamma$ | 666.0%   |
| A10     | 0203                         | 0203/3101     | IFN- $\gamma$ | 109.1%   |               |               |          |               |               |          |
| A12     | 1101, 1102, 3303             | 1101/3001     | CFSE          | 22.1%    | 0201/1101     | IFN- $\gamma$ | 158.5%   | 3303/1101     | IFN- $\gamma$ | 263.0%   |
| A16     | 1101, 3303                   | 0201/1101     | CFSE          | 40.8%    |               |               |          |               |               |          |
| A18     | 1102, 3303, 3001             | 1101/3101     | IFN- $\gamma$ | 119.1%   |               |               |          |               |               |          |
| A19     | 1102                         | 1101/3101     | IFN- $\gamma$ | 102.9%   | 1101/2402     | CFSE          | 22.3%    |               |               |          |
| A20     | 2402                         | 2402/2601     | IFN- $\gamma$ | 543.9%   | 2402/2402     | IFN- $\gamma$ | 146.1%   |               |               |          |
| A21     | 2402                         | 2402/2601     | IFN- $\gamma$ | 1154.4%  | 2402/2402     | IFN- $\gamma$ | 153.2%   |               |               |          |
| A22     | 2402                         | 2402/2601     | IFN- $\gamma$ | 378.9%   |               |               |          |               |               |          |
| A23     | 2402                         | 2402/2601     | IFN- $\gamma$ | 303.5%   | 2402/2402     | IFN- $\gamma$ | 135.5%   |               |               |          |
| A25     | 3001                         | 1101/3001     | CFSE          | 129.2%   |               |               |          |               |               |          |
| A26     | 3001                         | 1101/3001     | CFSE          | 39.5%    | 1101/3001     | IFN- $\gamma$ | 291.0%   |               |               |          |
| B1      | 0201, 0206, 0203             | 0201/3303     | IFN- $\gamma$ | 110.8%   | 0201/3001     | IFN- $\gamma$ | 222.9%   | 6801/3303     | IFN- $\gamma$ | 398.0%   |
| B2      | 0201, 0206, 0203, 0207       | 0201/0101     | IFN- $\gamma$ | 128.1%   |               |               |          |               |               |          |
| B3      | 0201, 0207, 0206             | 0201/3001     | IFN- $\gamma$ | 407.3%   |               |               |          |               |               |          |
| B4      | 0201, 0206                   | 0201/3001     | IFN- $\gamma$ | 216.6%   |               |               |          |               |               |          |
| B6      | 0201, 0207, 0203             | 0203/0207     | IFN- $\gamma$ | 242.1%   | 0201/1101     | CFSE          | 35.7%    | 2402/0207     | IFN- $\gamma$ | 164.8%   |
| B10     | 0207                         | 0207/0206     | IFN- $\gamma$ | 888.7%   | 3101/0207     | IFN- $\gamma$ | 120.0%   | 2402/0207     | IFN- $\gamma$ | 123.8%   |
| B11     | 0206                         | 0206/1101     | IFN- $\gamma$ | 154.5%   | 0206/3201     | CFSE          | 25.8%    | 1101/0206     | IFN- $\gamma$ | 307.0%   |
| B12     | 0206                         | 1101/0206     | CFSE          | 22.5%    | 1101/0206     | IFN- $\gamma$ | 104.0%   |               |               |          |
| B15     | 0203                         | 0203/3101     | IFN- $\gamma$ | 416.5%   |               |               |          |               |               |          |

|     |                  |           |               |         |           |               |        |           |               |        |
|-----|------------------|-----------|---------------|---------|-----------|---------------|--------|-----------|---------------|--------|
| B16 | 0203             | 0203/3001 | CFSE          | 24.7%   |           |               |        |           |               |        |
| B17 | 0203             | 0203/3101 | IFN- $\gamma$ | 122.7%  |           |               |        |           |               |        |
| B18 | 1101, 1102       | 1101/3001 | CFSE          | 79.0%   |           |               |        |           |               |        |
| B20 | 1101, 1102, 3303 | 0201/1101 | CFSE          | 33.4%   |           |               |        |           |               |        |
| B21 | 1101, 1102       | 0201/1101 | CFSE          | 55.4%   |           |               |        |           |               |        |
| B23 | 1101, 1102, 3303 | 3303/1101 | IFN- $\gamma$ | 431.5%  |           |               |        |           |               |        |
| B26 | 2402             | 2402/2402 | IFN- $\gamma$ | 214.5%  | 2402/2601 | IFN- $\gamma$ | 277.2% |           |               |        |
| B28 | 2402             | 2402/3303 | IFN- $\gamma$ | 214.5%  |           |               |        |           |               |        |
| B29 | 2402             | 2402/3303 | IFN- $\gamma$ | 500.0%  | 2402/2402 | IFN- $\gamma$ | 341.8% | 6801/3303 | IFN- $\gamma$ | 142.5% |
| B30 | 2402             | 2402/3303 | IFN- $\gamma$ | 362.7%  |           |               |        |           |               |        |
| B31 | 2402             | 2402/2402 | IFN- $\gamma$ | 129.0%  | 2402/2402 | IFN- $\gamma$ | 139.0% |           |               |        |
| B34 | 3303             | 3303/3001 | IFN- $\gamma$ | 102.1%  |           |               |        |           |               |        |
| B35 | 3303             | 3303/1101 | IFN- $\gamma$ | 148.2%  |           |               |        |           |               |        |
| B36 | 3001             | 1101/3001 | CFSE          | 54.9%   | 1101/3001 | IFN- $\gamma$ | 374.0% |           |               |        |
| B37 | 3001             | 1101/3001 | CFSE          | 34.9%   | 3001/2402 | IFN- $\gamma$ | 110.5% | 1101/3001 | IFN- $\gamma$ | 191.0% |
| B38 | 3001             | 2402/3001 | IFN- $\gamma$ | 186.8%  |           |               |        |           |               |        |
| B40 | 3001             | 1101/3001 | IFN- $\gamma$ | 140.0%  |           |               |        |           |               |        |
| B41 | 3001             | 1101/3001 | IFN- $\gamma$ | 425.0%  |           |               |        |           |               |        |
| C1  | 0201, 0206, 0203 | 0201/1101 | CFSE          | 30.0%   |           |               |        |           |               |        |
| C3  | 0201, 0206, 0203 | 0201/2402 | IFN- $\gamma$ | 270.9%  |           |               |        |           |               |        |
| C10 | 0206             | 0206/1101 | CFSE          | 25.9%   |           |               |        |           |               |        |
| C12 | 0206             | 0206/3201 | CFSE          | 20.8%   |           |               |        |           |               |        |
| C16 | 0206             | 0206/1101 | IFN- $\gamma$ | 187.7%  |           |               |        |           |               |        |
| C17 | 0203             | 0203/3101 | IFN- $\gamma$ | 157.4%  |           |               |        |           |               |        |
| C27 | 1101             | 1101/1101 | CFSE          | 40.1%   |           |               |        |           |               |        |
| C35 | 2402             | 2402/2601 | IFN- $\gamma$ | 144.0%  |           |               |        |           |               |        |
| C45 | 3303             | 1101/3303 | IFN- $\gamma$ | 181.1%  |           |               |        |           |               |        |
| C46 | 3303             | 1101/3303 | IFN- $\gamma$ | 100.0%  |           |               |        |           |               |        |
| C47 | 3303             | 1101/0101 | IFN- $\gamma$ | 223.8%  |           |               |        |           |               |        |
| C49 | 1102             | 0201/1101 | IFN- $\gamma$ | 1663.3% |           |               |        |           |               |        |
| D2  | 0201, 0206, 0203 | 0201/1101 | IFN- $\gamma$ | 122.3%  |           |               |        |           |               |        |
| D5  | 0207, 0206, 1102 | 0206/1102 | IFN- $\gamma$ | 479.2%  |           |               |        |           |               |        |
| D6  | 0201, 0207       | 0201/2402 | CFSE          | 105.5%  | 0201/0101 | IFN- $\gamma$ | 106.9% |           |               |        |
| D12 | 0201, 0207, 0206 | 0201/0201 | CFSE          | 23.4%   |           |               |        |           |               |        |
| D13 | 0201, 0203       | 0201/2402 | IFN- $\gamma$ | 1001.3% |           |               |        |           |               |        |

|     |                        |           |               |        |           |               |        |  |  |
|-----|------------------------|-----------|---------------|--------|-----------|---------------|--------|--|--|
| D17 | 0207, 0203             | 0206/0207 | IFN- $\gamma$ | 112.3% |           |               |        |  |  |
| D26 | 0206                   | 0201/0207 | CFSE          | 29.9%  |           |               |        |  |  |
| D30 | 0203                   | 0203/0206 | CFSE          | 34.6%  | 0203/0207 | IFN- $\gamma$ | 145.3% |  |  |
| D31 | 0203                   | 0203/0206 | CFSE          | 33.5%  |           |               |        |  |  |
| D32 | 0203                   | 0203/0206 | CFSE          | 33.3%  |           |               |        |  |  |
| D33 | 0203, 0206             | 0203/0206 | CFSE          | 28.0%  |           |               |        |  |  |
| D34 | 1101/1102              | 1101/0101 | IFN- $\gamma$ | 117.2% |           |               |        |  |  |
| D38 | 1101, 1102             | 1101/0101 | IFN- $\gamma$ | 105.9% |           |               |        |  |  |
| D40 | 1101, 1102, 3001       | 1101/3303 | IFN- $\gamma$ | 100.0% |           |               |        |  |  |
| D41 | 1101                   | 1101/0101 | IFN- $\gamma$ | 268.0% |           |               |        |  |  |
| D42 | 1101, 0206, 0201       | 1101/0101 | IFN- $\gamma$ | 128.4% | 1101/1101 | CFSE          | 47.6%  |  |  |
| D46 | 1102                   | 0201/1101 | IFN- $\gamma$ | 458.6% |           |               |        |  |  |
| D47 | 1102                   | 0201/1101 | IFN- $\gamma$ | 179.9% |           |               |        |  |  |
| D48 | 1102, 3303             | 0201/1101 | IFN- $\gamma$ | 166.9% | 3303/1101 | IFN- $\gamma$ | 117.8% |  |  |
| D50 | 1102                   | 0201/1101 | IFN- $\gamma$ | 242.0% |           |               |        |  |  |
| D52 | 2402                   | 2402/3001 | IFN- $\gamma$ | 241.7% |           |               |        |  |  |
| D53 | 2402, 3303             | 2402/3001 | IFN- $\gamma$ | 460.8% | 3303/1101 | IFN- $\gamma$ | 275.5% |  |  |
| D55 | 2402                   | 2402/0207 | IFN- $\gamma$ | 110.2% |           |               |        |  |  |
| D56 | 2402                   | 2402/2601 | IFN- $\gamma$ | 266.9% |           |               |        |  |  |
| D62 | 2402                   | 2402/3001 | IFN- $\gamma$ | 182.4% |           |               |        |  |  |
| D64 | 2402                   | 0201/2402 | IFN- $\gamma$ | 144.9% |           |               |        |  |  |
| D65 | 3001                   | 0101/3001 | CFSE          | 20.8%  |           |               |        |  |  |
| D71 | 3001                   | 0301/3001 | IFN- $\gamma$ | 132.9% |           |               |        |  |  |
| D72 | 3001, 1102, 0201, 0207 | 3303/1101 | IFN- $\gamma$ | 157.7% |           |               |        |  |  |
| D76 | 3303                   | 1101/0101 | IFN- $\gamma$ | 346.7% |           |               |        |  |  |
| D77 | 3303, 1102             | 3303/1101 | IFN- $\gamma$ | 109.5% | 3303/0203 | IFN- $\gamma$ | 102.9% |  |  |
| D78 | 3303, 0203, 0206       | 3303/1101 | IFN- $\gamma$ | 101.4% |           |               |        |  |  |
| D79 | 3303, 1101, 0207, 2402 | 3303/1101 | IFN- $\gamma$ | 175.8% |           |               |        |  |  |
| D80 | 3303, 1102, 0201, 0207 | 3303/1101 | IFN- $\gamma$ | 148.2% |           |               |        |  |  |
| D81 | 3303, 1102, 0203       | 3303/1101 | IFN- $\gamma$ | 149.6% |           |               |        |  |  |
| D82 | 3303, 1102             | 3303/1101 | IFN- $\gamma$ | 101.7% |           |               |        |  |  |
| R4  | 0201                   | 0201/1101 | IFN- $\gamma$ | 107.8% | 0201/3201 | CFSE          | 47.3%  |  |  |

|     |                        |           |               |        |           |               |        |  |  |  |
|-----|------------------------|-----------|---------------|--------|-----------|---------------|--------|--|--|--|
| R5  | 0201, 0203             | 0201/3201 | CFSE          | 107.8% | 0201/0101 | IFN- $\gamma$ | 117.5% |  |  |  |
| R6  | 0201, 0207, 0206, 0203 | 0201/3201 | CFSE          | 49.3%  |           |               |        |  |  |  |
| R8  | 0201                   | 0201/0101 | IFN- $\gamma$ | 113.2% |           |               |        |  |  |  |
| R9  | 0201, 0206, 0203       | 0201/0101 | IFN- $\gamma$ | 107.0% |           |               |        |  |  |  |
| R10 | 0201                   | 0201/2402 | IFN- $\gamma$ | 104.3% |           |               |        |  |  |  |
| R11 | 0201                   | 0201/3001 | IFN- $\gamma$ | 203.6% | 0201/1101 | IFN- $\gamma$ | 104.4% |  |  |  |
| R12 | 0201                   | 0201/3001 | IFN- $\gamma$ | 147.0% | 0201/0101 | IFN- $\gamma$ | 188.6% |  |  |  |
| R13 | 0201                   | 0201/3001 | IFN- $\gamma$ | 147.0% | 0201/1101 | IFN- $\gamma$ | 126.9% |  |  |  |
| R14 | 0201, 0203             | 0201/0101 | IFN- $\gamma$ | 133.3% |           |               |        |  |  |  |
| R15 | 0201                   | 0201/2402 | IFN- $\gamma$ | 218.4% |           |               |        |  |  |  |
| R17 | 0207                   | 0207/0206 | IFN- $\gamma$ | 103.0% |           |               |        |  |  |  |
| R23 | 0206                   | 2402/0207 | IFN- $\gamma$ | 109.4% |           |               |        |  |  |  |
| R24 | 0203                   | 0203/0206 | CFSE          | 60.8%  |           |               |        |  |  |  |
| R30 | 1101                   | 1101/3001 | CFSE          | 110.2% | 0201/1101 | CFSE          | 38.7%  |  |  |  |
| R32 | 1101/1102              | 0201/1101 | CFSE          | 29.3%  |           |               |        |  |  |  |
| R34 | 1101, 3001             | 0201/1101 | CFSE          | 20.0%  | 1101/3101 | IFN- $\gamma$ | 122.1% |  |  |  |
| R35 | 1101, 1102             | 1101/3101 | CFSE          | 24.9%  |           |               |        |  |  |  |
| R38 | 1101, 3303             | 0201/1101 | CFSE          | 50.2%  |           |               |        |  |  |  |
| R39 | 1101, 1102, 3001       | 0201/1101 | CFSE          | 54.3%  |           |               |        |  |  |  |
| R40 | 1101, 3001             | 0201/1101 | CFSE          | 39.7%  | 0201/1101 | CFSE          | 19.5%  |  |  |  |
| R41 | 1101, 3303             | 0201/1101 | CFSE          | 53.3%  |           |               |        |  |  |  |
| R42 | 1101                   | 0201/1101 | CFSE          | 21.0%  |           |               |        |  |  |  |
| R43 | 1101, 3303             | 1101/3001 | CFSE          | 41.9%  | 0201/1101 | CFSE          | 34.5%  |  |  |  |
| R44 | 1101, 1102             | 0201/1101 | CFSE          | 37.6%  | 0201/1101 | CFSE          | 24.8%  |  |  |  |
| R47 | 2402                   | 2402/3303 | IFN- $\gamma$ | 339.8% |           |               |        |  |  |  |
| R48 | 2402                   | 2402/3303 | IFN- $\gamma$ | 309.6% |           |               |        |  |  |  |

891 Note 1: **CFSE**: After DC-peptide-CFSE-prelabeled PBLs co-cultures, the proliferation percentage of CD8<sup>+</sup>  
892 T cells in CD3<sup>+</sup>/CD8<sup>+</sup> population was analyzed according to the reduction of CFSE-staining brightness.  
893 **IFN- $\gamma$** : After DC-peptide-PBLs co-cultures, the frequency of IFN- $\gamma$ <sup>+</sup>/CD8<sup>+</sup> T cells in CD3<sup>+</sup>/CD8<sup>+</sup>  
894 population was analyzed by flow cytometry. **Enhance%**: The increased percentage when the frequency of  
895 IFN- $\gamma$ <sup>+</sup>/CD8<sup>+</sup> T cells or proliferation percentage of CD8<sup>+</sup> T cells in the DC-peptide-PBL co-culture wells  
896 was compared with that in the DC-PBL co-culture well without peptide. Note 2: The previously reported  
897 epitopes include C1, C35, C49, D34, D46, D47, D48, D52, D53 and R32.

898 Table 2: Affinity of SARS-CoV-2 CD8<sup>+</sup> T cell epitopes with HLA-A allotypes as detected by  
 899 HLA-A competitive binding experiments using HMy2.CIR cell lines.

| HLA-A  | Epitope | Affinity | 5μM<br>Competitive<br>inhibition% | 15μM<br>Competitive<br>inhibition% | Epitope | Affinity | 5μM<br>Competitive<br>inhibition% | 15μM<br>Competitive<br>inhibition% |
|--------|---------|----------|-----------------------------------|------------------------------------|---------|----------|-----------------------------------|------------------------------------|
| A*0201 | R12     | high     | 91.70%                            | 91.10%                             | R6      | low/no   | 13.40%                            | 23.70%                             |
|        | R8      | high     | 85.50%                            | 89.90%                             | D5      | low/no   | 10.00%                            | 37.80%                             |
|        | B1      | high     | 80%                               | 88.20%                             | A5      | low/no   | 9.40%                             | 6.20%                              |
|        | R10     | high     | 75.80%                            | 92.80%                             | R13     | low/no   | 8.66%                             | 28.90%                             |
|        | R15     | high     | 70.80%                            | 93.80%                             | D80     | low/no   | 6.38%                             | 5.25%                              |
|        | B3      | high     | 66.10%                            | 74.40%                             | D42     | low/no   | 5.93%                             | 6.72%                              |
|        | R9      | high     | 64.80%                            | 89.50%                             | D72     | low/no   | 5.93%                             | 6.38%                              |
|        | R5      | high     | 58.70%                            | 89.10%                             | A4      | low/no   | 4.80%                             | 4.00%                              |
|        | R11     | inter    | 47.80%                            | 86.40%                             | R14     | low/no   | 4.50%                             | 13.30%                             |
|        | B2      | inter    | 42.10%                            | 83.70%                             | A1      | low/no   | 3.30%                             | 2.90%                              |
|        | R4      | inter    | 40.40%                            | 78.30%                             | A3      | low/no   | 1.90%                             | 1.40%                              |
|        | B6      | inter    | 33.00%                            | 65.90%                             | D13     | low/no   | 0.70%                             | 1.20%                              |
|        | D2      | inter    | 24.50%                            | 55.00%                             | C1      | low/no   | 0                                 | 10.30%                             |
|        | D12     | low/no   | 20.10%                            | 32.60%                             | C3      | low/no   | 0                                 | 7.10%                              |
|        | B4      | low/no   | 16.70%                            | 20.70%                             | D6      | low/no   | 0                                 | 2.10%                              |
|        | A*1101  | D38      | high                              | 80.70%                             | 87.70%  | D48      | low/no                            | 34.38%                             |
| D41    |         | high     | 80.38%                            | 89.72%                             | D50     | low/no   | 32.38%                            | 43.38%                             |
| R43    |         | high     | 79.50%                            | 89.20%                             | B23     | low/no   | 32.30%                            | 41.00%                             |
| R32    |         | high     | 73.90%                            | 89.40%                             | R41     | low/no   | 31.90%                            | 46.20%                             |
| R30    |         | high     | 72.60%                            | 84.90%                             | B18     | low/no   | 21.55%                            | 34.38%                             |
| D34    |         | high     | 67.70%                            | 84.70%                             | D82     | low/no   | 20.72%                            | 38.22%                             |
| B20    |         | high     | 61.88%                            | 55.88%                             | A16     | low/no   | 18.38%                            | 19.22%                             |
| D72    |         | high     | 58.05%                            | 76.05%                             | D77     | low/no   | 15.72%                            | 29.38%                             |
| D40    |         | high     | 56.70%                            | 82.60%                             | D42     | low/no   | 14.70%                            | 47.80%                             |
| D47    |         | high     | 53.38%                            | 67.72%                             | A12     | low/no   | 14.38%                            | 15.00%                             |
| R42    |         | high     | 50.20%                            | 75.20%                             | R38     | low/no   | 12.10%                            | 47.10%                             |
| R44    |         | inter    | 47.60%                            | 81.4                               | B21     | low/no   | 10.55%                            | 29.38%                             |
| C49    |         | inter    | 47.38%                            | 74.22%                             | D79     | low/no   | 10.22%                            | 25.22%                             |
| D81    |         | inter    | 0.4238                            | 52.22%                             | R34     | low/no   | 10.00%                            | 25.90%                             |
| D46    |         | inter    | 34.38%                            | 52.22%                             | D80     | low/no   | 4.22%                             | 5.55%                              |
| R40    |         | inter    | 30.70%                            | 67.10%                             | A19     | low/no   | 0.20%                             | 2.60%                              |
| C27    | inter   | 28.00%   | 54.40%                            | A18                                | low/no  | 0        | 4.00%                             |                                    |
| R39    | inter   | 23.70%   | 53.60%                            |                                    |         |          |                                   |                                    |
| R35    | inter   | 22.50%   | 52.30%                            |                                    |         |          |                                   |                                    |
| A*3303 | D80     | high     | 86.40%                            | 97.40%                             | B23     | low/no   | 21.26%                            | 34.07%                             |
|        | D76     | high     | 75.40%                            | 94.20%                             | B21     | low/no   | 20.36%                            | 46.43%                             |

|        |     |        |        |        |     |        |        |        |
|--------|-----|--------|--------|--------|-----|--------|--------|--------|
|        | R34 | high   | 72.50% | 91.00% | R38 | low/no | 18.79% | 42.61% |
|        | D77 | high   | 64.20% | 81.80% | D53 | low/no | 14.94% | 35.87% |
|        | R43 | high   | 60.81% | 65.75% | D48 | low/no | 13.39% | 43.28% |
|        | D82 | high   | 49.40% | 75.90% | C46 | low/no | 10.90% | 42.80% |
|        | B34 | inter  | 41.26% | 54.29% | A18 | low/no | 8.90%  | 11.15% |
|        | D79 | inter  | 33.10% | 62.70% | B35 | low/no | 8.10%  | 41.40% |
|        | D81 | inter  | 16.00% | 74.00% | B20 | low/no | 7.10%  | 14.74% |
|        | C47 | inter  | 9.90%  | 60.20% | A12 | low/no | 6.65%  | 0.00%  |
|        | R41 | inter  | 8.00%  | 51.15% | D78 | low/no | 3.30%  | 20.30% |
|        | A16 | low/no | 42.61% | 46.43% | C45 | low/no | 0.00%  | 29.10% |
| A*0203 | D30 | high   | 82.80% | 91.80% | B16 | low/no | 38.10% | 38.00% |
|        | R24 | high   | 61.30% | 78.80% | D17 | low/no | 21.83% | 43.31% |
|        | B17 | high   | 57.00% | 70.50% | C3  | low/no | 11.44% | 28.39% |
|        | B15 | high   | 50%    | 54.00% | B6  | low/no | 6.43%  | 46.41% |
|        | D5  | high   | 70.87% | 83.76% | R6  | low/no | 5.84%  | 8.10%  |
|        | R5  | high   | 60.37% | 81.49% | A4  | low/no | 4.64%  | 8.94%  |
|        | R9  | high   | 59.30% | 81.61% | A5  | low/no | 5.24%  | 11.09% |
|        | D2  | high   | 53.45% | 55.36% | D81 | low/no | 4.64%  | 6.79%  |
|        | B2  | high   | 51.90% | 68.84% | D78 | low/no | 3.93%  | 3.21%  |
|        | D33 | inter  | 42.30% | 81.20% | D31 | low/no | 0      | 14.80% |
|        | B1  | inter  | 37.82% | 57.74% | A10 | low/no | 0      | 0      |
|        | R14 | inter  | 37.10% | 65.74% | D32 | low/no | 0      | 0      |
|        | D13 | inter  | 25.29% | 55.48% |     |        |        |        |
|        | C17 | inter  | 21.70% | 51.30% |     |        |        |        |
|        | C1  | inter  | 20.39% | 54.54% |     |        |        |        |
| A*0206 | D26 | high   | 52.30% | 68.10% | C10 | low/no | 17.08% | 31.68% |
|        | R23 | inter  | 39.30% | 50.10% | D12 | low/no | 17.08% | 29.07% |
|        | B3  | inter  | 42.63% | 57.11% | A1  | low/no | 16.30% | 16.95% |
|        | D2  | inter  | 41.72% | 63.49% | C1  | low/no | 15.91% | 21.77% |
|        | B1  | inter  | 41.20% | 60.37% | A6  | low/no | 15.51% | 13.30% |
|        | B2  | inter  | 37.29% | 54.89% | R6  | low/no | 14.73% | 18.64% |
|        | D33 | inter  | 35.72% | 68.19% | C16 | low/no | 12.65% | 13.69% |
|        | R9  | inter  | 30.12% | 73.53% | C3  | low/no | 12.65% | 13.30% |
|        | C12 | low/no | 19.43% | 36.25% | D42 | low/no | 9.26%  | 12.78% |
|        | B4  | low/no | 18.77% | 14.34% | D78 | low/no | 8.47%  | 8.34%  |
|        | B11 | low/no | 18.30% | 43.40% | A9  | low/no | 0      | 10.20% |
|        | B12 | low/no | 17.00% | 32.60% |     |        |        |        |
| A*2402 | B30 | high   | 88.65% | 91.49% | B28 | low/no | 18.00% | 28.20% |
|        | R47 | high   | 88.50% | 88.70% | A22 | low/no | 10.70% | 29.30% |
|        | B26 | high   | 83.60% | 82.60% | D52 | low/no | 6.25%  | 24.78% |
|        | B31 | high   | 81.10% | 86.30% | A1  | low/no | 5.60%  | 7.20%  |
|        | D55 | high   | 73.07% | 78.50% | A20 | low/no | 5.30%  | 21.30% |
|        | B29 | high   | 70.10% | 74.90% | C35 | low/no | 2.80%  | 10.10% |

|        |     |        |        |        |     |        |        |        |
|--------|-----|--------|--------|--------|-----|--------|--------|--------|
|        | D53 | high   | 59.85% | 62.21% | A23 | low/no | 1.20%  | 1.20%  |
|        | R48 | inter  | 40.10% | 51.00% | A19 | low/no | 0.00%  | 0.00%  |
|        | D62 | inter  | 37.53% | 75.19% | A21 | low/no | 0.00%  | 0.00%  |
|        | D64 | inter  | 35.05% | 69.41% | D79 | low/no | 0.00%  | 0.00%  |
|        | D56 | low/no | 30.21% | 45.80% |     |        |        |        |
| A*0207 | A7  | high   | 68.52% | 69.58% | R6  | low/no | 35.22% | 48.64% |
|        | B2  | high   | 63.58% | 64.64% | D72 | low/no | 32.87% | 41.69% |
|        | R17 | high   | 57.11% | 62.75% | D80 | low/no | 20.64% | 47.93% |
|        | B6  | high   | 56.40% | 60.87% | D79 | low/no | 18.75% | 29.58% |
|        | A6  | high   | 54.99% | 62.05% | D17 | low/no | 16.40% | 21.11% |
|        | B3  | high   | 54.99% | 63.34% | D5  | low/no | 11.46% | 44.64% |
|        | A1  | inter  | 45.22% | 50.16% | B10 | low/no | 2.40%  | 0.00%  |
|        | D6  | low/no | 46.40% | 48.05% | D12 | low/no | 0.00%  | 0.00%  |
|        | A4  | low/no | 36.40% | 40.40% |     |        |        |        |
| A*3001 | D65 | high   | 75.62% | 79.92% | D72 | inter  | 44.70% | 62.45% |
|        | D71 | high   | 72.12% | 65.13% | R34 | inter  | 31.53% | 54.11% |
|        | B40 | high   | 63.52% | 72.12% | R40 | low/no | 38.25% | 29.92% |
|        | B41 | high   | 60.30% | 60.30% | A26 | low/no | 37.18% | 18.90% |
|        | B36 | high   | 60.03% | 73.20% | D40 | low/no | 36.91% | 42.55% |
|        | B37 | high   | 54.11% | 60.03% | A25 | low/no | 20.51% | 33.15% |
|        | B38 | inter  | 49.54% | 61.91% | A18 | low/no | 15.94% | 35.83% |
|        | R39 | inter  | 46.05% | 55.46% |     |        |        |        |

900 Note: IC50 is the concentration of unlabeled peptide required to inhibit the binding of labeled  
 901 reference peptide by 50%, which is calculated from the competitively binding inhibition (%)  
 902 of the sample at 5 $\mu$ M and 15 $\mu$ M.

903 Binding affinity of unlabeled peptide with indicated HLA-A molecule is assessed by IC50.  
 904 IC50<5 $\mu$ M means high binding affinity, between 5-15 $\mu$ M means intermediate binding affinity,  
 905 more than 15 $\mu$ M means low binding affinity or no binding affinity.

906

907

908

909

910

911

912

913

914 Table 3: HLA-A restrictions of the 120 SARS-CoV-2 epitopes

| Epitope | On-silicon prediction         | CIR cell lines HLA-A competitive binding assay |                |                     | No test |
|---------|-------------------------------|------------------------------------------------|----------------|---------------------|---------|
|         |                               | High affinity                                  | Inter affinity | low/no affinity     |         |
| A1      | A0201,A0207,A0206,<br>A2402   |                                                | A0207          | A0206 >A2402 >A0201 |         |
| A3      | A0201                         |                                                |                | A0201               |         |
| A4      | A0201, A0207, A0203           |                                                |                | A0207>A0201 > A0203 |         |
| A5      | A0201, A0203                  |                                                |                | A0201> A0203        |         |
| A6      | A0207, A0206                  | A0207                                          |                | A0206               |         |
| A7      | A0207                         | A0207                                          |                |                     |         |
| A9      | A0206                         |                                                |                | A0206               |         |
| A10     | A0203                         |                                                |                | A0203               |         |
| A12     | A1101, A1102, A3303           |                                                |                | A1101 > A3303       | A1102   |
| A16     | A1101, A3303                  |                                                |                | A3303 > A1101       |         |
| A18     | A1102, A3303, A3001           |                                                |                | A3001>A3303 > A1101 |         |
| A19     | A1102                         |                                                |                | A1101               | A1102   |
| A20     | A2402                         |                                                |                | A2402               |         |
| A21     | A2402                         |                                                |                | A2402               |         |
| A22     | A2402                         |                                                |                | A2402               |         |
| A23     | A2402                         |                                                |                | A2402               |         |
| A25     | A3001                         |                                                |                | A3001               |         |
| A26     | A3001                         |                                                |                | A3001               |         |
| B1      | A0201, A0206, A0203           | A0201                                          | A0206 >A0203   |                     |         |
| B2      | A0201, A0206, A0203,<br>A0207 | A0207>A0203                                    | A0201 > A0206  |                     |         |
| B3      | A0201, A0207, A0206           | A0201>A0207                                    | A0206          |                     |         |
| B4      | A0201, A0206                  |                                                |                | A0206 >A0201        |         |
| B6      | A0201, A0207, A0203           | A0207                                          | A0201          | A0203               |         |
| B10     | A0207                         |                                                |                | A0207               |         |
| B11     | A0206                         |                                                |                | A0206               |         |
| B12     | A0206                         |                                                |                | A0206               |         |
| B15     | A0203                         | A0203                                          |                |                     |         |
| B16     | A0203                         |                                                |                | A0203               |         |
| B17     | A0203                         | A0203                                          |                |                     |         |
| B18     | A1101, A1102                  |                                                |                | A1101               | A1102   |
| B20     | A1101, A1102, A3303           | A1101                                          |                | A3303               | A1102   |
| B21     | A1101, A1102                  |                                                |                | A1101               | A1102   |
| B23     | A1101, A1102, A3303           |                                                |                | A1101 > A3303       | A1102   |
| B26     | A2402                         | A2402                                          |                |                     |         |
| B28     | A2402                         |                                                |                | A2402               |         |
| B29     | A2402                         | A2402                                          |                |                     |         |
| B30     | A2402                         | A2402                                          |                |                     |         |



|     |                     |       |               |                       |       |
|-----|---------------------|-------|---------------|-----------------------|-------|
| B31 | A2402               | A2402 |               |                       |       |
| B34 | A3303               |       | A3303         |                       |       |
| B35 | A3303               |       |               | A3303                 |       |
| B36 | A3001               | A3001 |               |                       |       |
| B37 | A3001               | A3001 |               |                       |       |
| B38 | A3001               |       | A3001         |                       |       |
| B40 | A3001               | A3001 |               |                       |       |
| B41 | A3001               | A3001 |               |                       |       |
| C1  | A0201, A0206, A0203 |       | A0203         | A0206 > A0201         |       |
| C3  | A0201, A0206, A0203 |       |               | A0206 > A0203 > A0201 |       |
| C10 | A0206               |       |               | A0206                 |       |
| C12 | A0206               |       |               | A0206                 |       |
| C16 | A0206               |       |               | A0206                 |       |
| C17 | A0203               |       | A0203         |                       |       |
| C27 | A1101               |       | A1101         |                       |       |
| C35 | A2402               |       |               | A2402                 |       |
| C45 | A3303               |       |               | A3303                 |       |
| C46 | A3303               |       |               | A3303                 |       |
| C47 | A3303               |       | A3303         |                       |       |
| C49 | A1102               |       | A1101         |                       | A1102 |
| D2  | A0201, A0206, A0203 | A0203 | A0206 > A0201 |                       |       |
| D5  | A0201, A0207, A0203 | A0203 |               | A0207 > A0201         |       |
| D6  | A0201, A0207        |       |               | A0207 > A0201         |       |
| D12 | A0201, A0207, A0206 |       | A0206         | A0201 > A0207         |       |
| D13 | A0201, A0203        |       | A0203         | A0201                 |       |
| D17 | A0207, A0203        |       |               | A0203 > A0207         |       |
| D26 | A0206               | A0206 |               |                       |       |
| D30 | A0203               | A0203 |               |                       |       |
| D31 | A0203               |       |               | A0203                 |       |
| D32 | A0203               |       |               | A0203                 |       |
| D33 | A0203, A0206        |       | A0203 > A0206 |                       |       |
| D34 | A1101, A1102        | A1101 |               |                       | A1102 |
| D38 | A1101, A1102        | A1101 |               |                       | A1102 |
| D40 | A1101, A1102, A3001 | A1101 |               | A3001                 | A1102 |
| D41 | A1101               | A1101 |               |                       |       |
| D42 | A1101, A0206, A0201 |       |               | A1101 > A0206 > A0201 |       |
| D46 | A1102               |       | A1101         |                       | A1102 |
| D47 | A1102               | A1101 |               |                       | A1102 |
| D48 | A1102, A3303        |       |               | A1101 > A3303         | A1102 |
| D50 | A1102               |       |               | A1101                 | A1102 |
| D52 | A2402               |       |               | A2402                 |       |
| D53 | A2402, A3303        | A2402 |               | A3303                 |       |
| D55 | A2402               | A2402 |               |                       |       |

|     |                               |               |               |                             |       |
|-----|-------------------------------|---------------|---------------|-----------------------------|-------|
| D56 | A2402                         |               |               | A2402                       |       |
| D62 | A2402                         |               | A2402         |                             |       |
| D64 | A2402                         |               | A2402         |                             |       |
| D65 | A3001                         | A3001         |               |                             |       |
| D71 | A3001                         | A3001         |               |                             |       |
| D72 | A3001,A1102,A0201,<br>A0207   | A1101         | A3001         | A0207>A0201                 |       |
| D76 | A3303                         | A3303         |               |                             |       |
| D77 | A3303, A1102                  | A3303         |               | A1101                       | A1102 |
| D78 | A3303, A0203, A0206           |               |               | A0206 >A0203 > A3303        |       |
| D79 | A3303, A1101, A0207,<br>A2402 |               | A3303         | A0207>A1101 > A2402         |       |
| D80 | A3303,A1102,A0201,<br>A0207   | A3303         |               | A0207>A0201 > A1101         | A1102 |
| D81 | A3303, A1102, A0203           |               | A1101 > A3303 | A0203                       | A1102 |
| D82 | A3303, A1102                  | A3303         |               | A1101                       | A1102 |
| R4  | A0201                         |               | A0201         |                             |       |
| R5  | A0201, A0203                  | A0203 > A0201 |               |                             |       |
| R6  | A0201,A0207,A0206,<br>A0203   |               |               | A0207>A0206>A0201><br>A0203 |       |
| R8  | A0201                         | A0201         |               |                             |       |
| R9  | A0201, A0206, A0203           | A0201 > A0203 | A0206         |                             |       |
| R10 | A0201                         | A0201         |               |                             |       |
| R11 | A0201                         |               | A0201         |                             |       |
| R12 | A0201                         | A0201         |               |                             |       |
| R13 | A0201                         |               |               | A0201                       |       |
| R14 | A0201, A0203                  |               | A0203         | A0201                       |       |
| R15 | A0201                         | A0201         |               |                             |       |
| R17 | A0207                         | A0207         |               |                             |       |
| R23 | A0206                         |               | A0206         |                             |       |
| R24 | A0203                         | A0203         |               |                             |       |
| R30 | A1101                         | A1101         |               |                             |       |
| R32 | A1101, A1102                  | A1101         |               |                             | A1102 |
| R34 | A1101, A3001, A3303           | A3303         | A3001         | A1101                       |       |
| R35 | A1101, A1102                  |               | A1101         |                             | A1102 |
| R38 | A1101, A3303                  |               |               | A3303 > A1101               |       |
| R39 | A1101, A1102, A3001           |               | A1101         |                             | A1102 |
| R40 | A1101, A3001                  |               | A1101         | A3001                       |       |
| R41 | A1101, A3303                  |               | A3303         | A1101                       |       |
| R42 | A1101                         | A1101         |               |                             |       |
| R43 | A1101, A3303                  | A1101 > A3303 |               |                             |       |
| R44 | A1101, A1102                  |               | A1101         |                             | A1102 |
| R47 | A2402                         | A2402         |               |                             |       |

|     |       |  |       |  |  |
|-----|-------|--|-------|--|--|
| R48 | A2402 |  | A2402 |  |  |
|-----|-------|--|-------|--|--|

915

916 Note: The HLA-A molecules highlighted in red displayed no affinity with indicated epitopes.

917 “>” means the affinity from high to low.

918

919

920

921

922

923

924

925

926

927

928

929

930

931

932

933

934

935

936

937

938

939

940

941

942

943

944

945

946

947

948

949

950

951

952

953

954

955

956

957  
958  
959  
960  
961

Figure 1:

**HBV positive reference peptides ( HBV111, HBV118)**

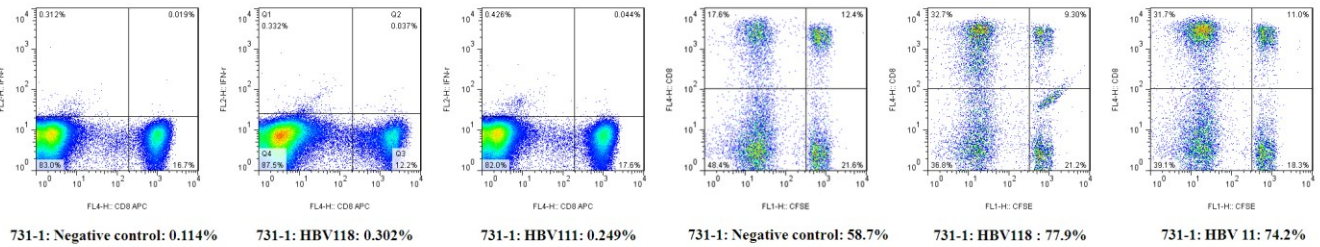

**HCC weak positive (HCC1-1, HCC1-2) and positive (HCC5-3, HCC5-4, HCC5-5) reference peptides**

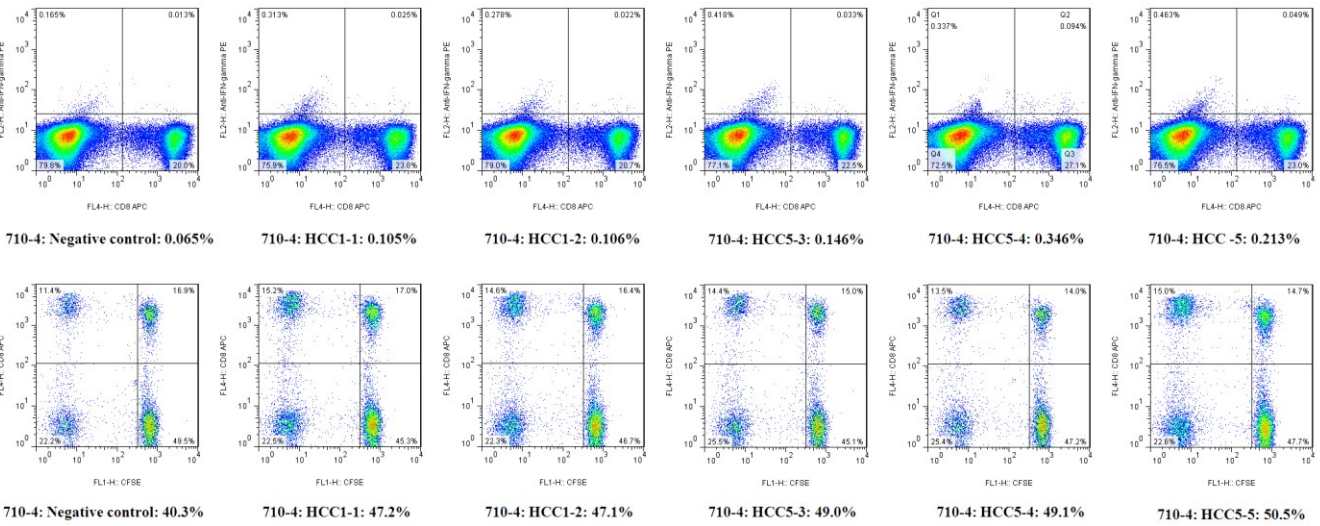

984  
985  
986  
987  
988  
989  
990  
991  
992  
993  
994  
995  
996  
997  
998  
999  
1000

1001  
1002  
1003  
1004

Figure 2:

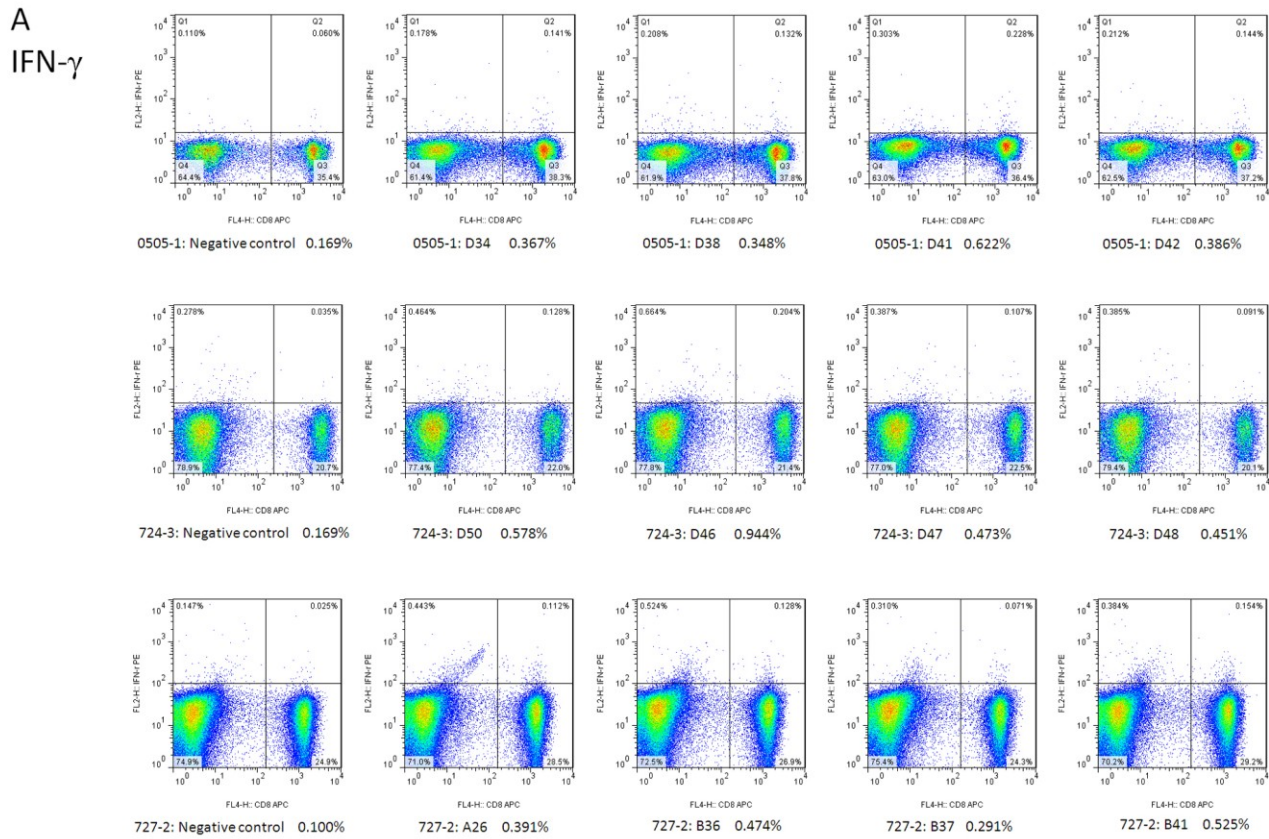

**B** CFSE

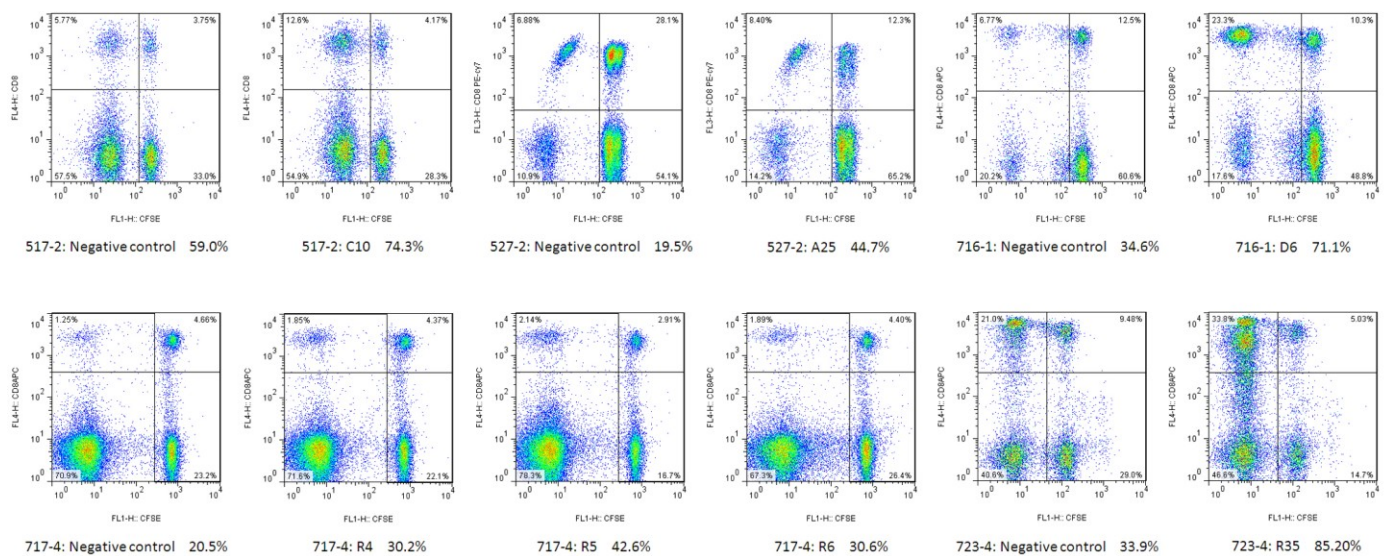

1040  
1041  
1042  
1043  
1044

1045  
1046  
1047  
1048

Figure 3:

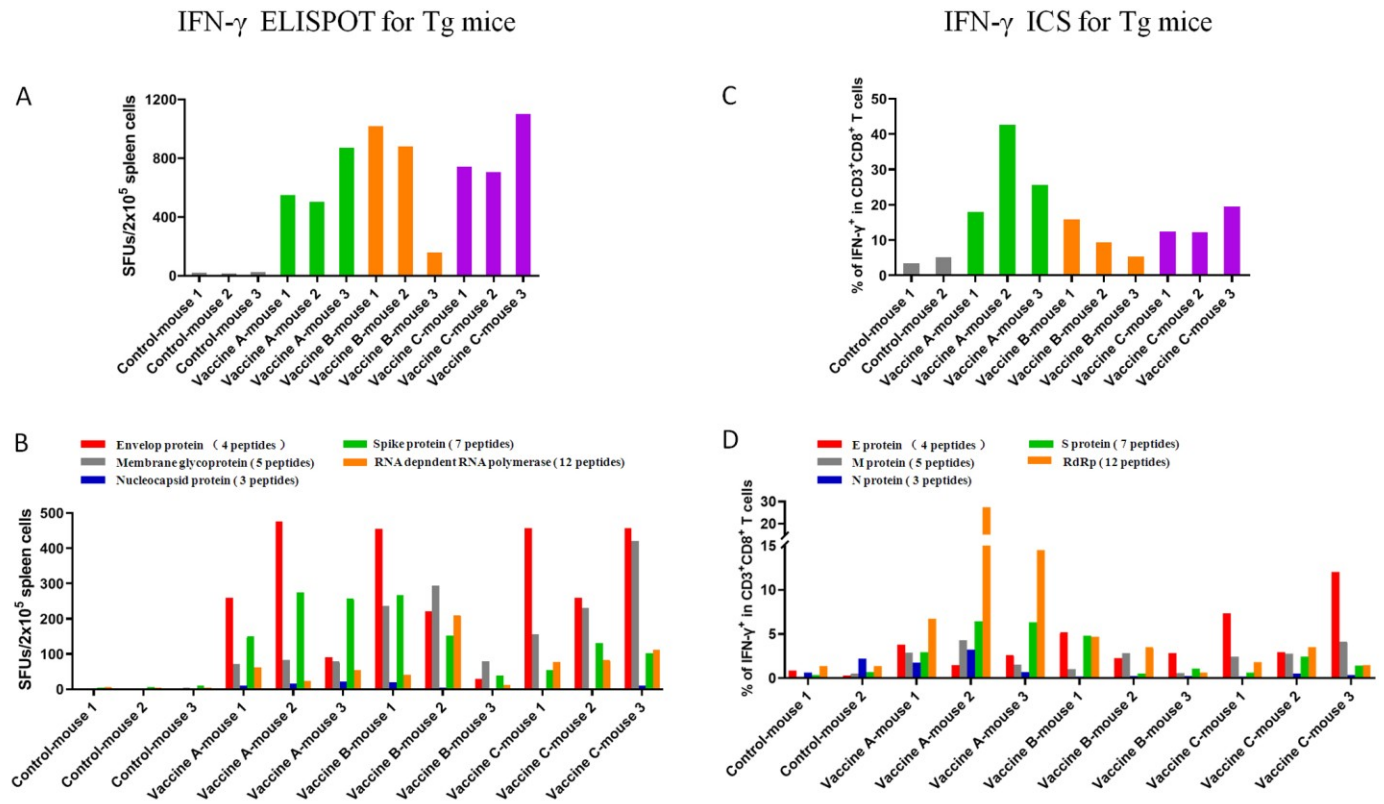

1069  
1070  
1071  
1072  
1073  
1074  
1075  
1076  
1077  
1078  
1079  
1080  
1081  
1082  
1083  
1084  
1085  
1086  
1087  
1088

1089 Figure 4:

1090  
1091  
1092  
1093  
1094  
1095  
1096  
1097  
1098  
1099  
1100  
1101  
1102  
1103  
1104  
1105  
1106  
1107  
1108  
1109  
1110  
1111  
1112  
1113  
1114  
1115  
1116  
1117  
1118  
1119  
1120  
1121  
1122  
1123  
1124  
1125  
1126  
1127  
1128  
1129  
1130  
1131  
1132

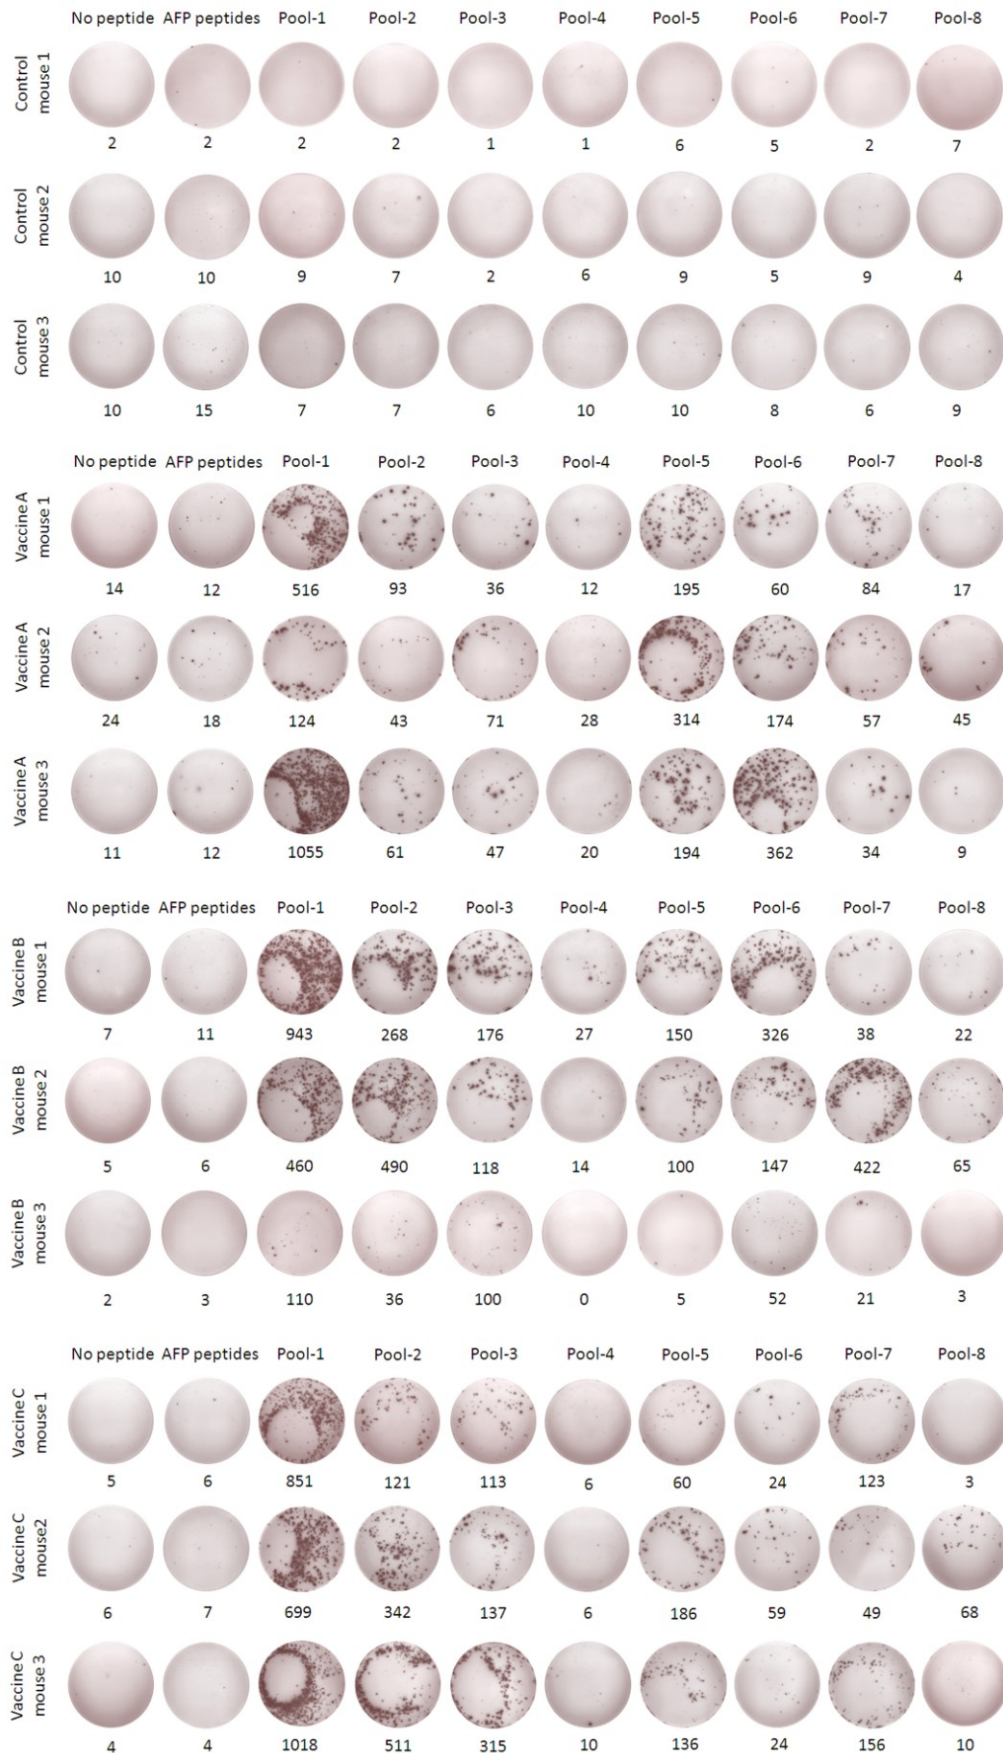

1133 Figure 5:

1134  
1135  
1136  
1137  
1138  
1139  
1140  
1141  
1142  
1143  
1144  
1145  
1146  
1147  
1148  
1149  
1150  
1151  
1152  
1153  
1154  
1155  
1156  
1157  
1158  
1159  
1160  
1161  
1162  
1163  
1164  
1165  
1166  
1167  
1168  
1169  
1170  
1171  
1172  
1173  
1174  
1175  
1176

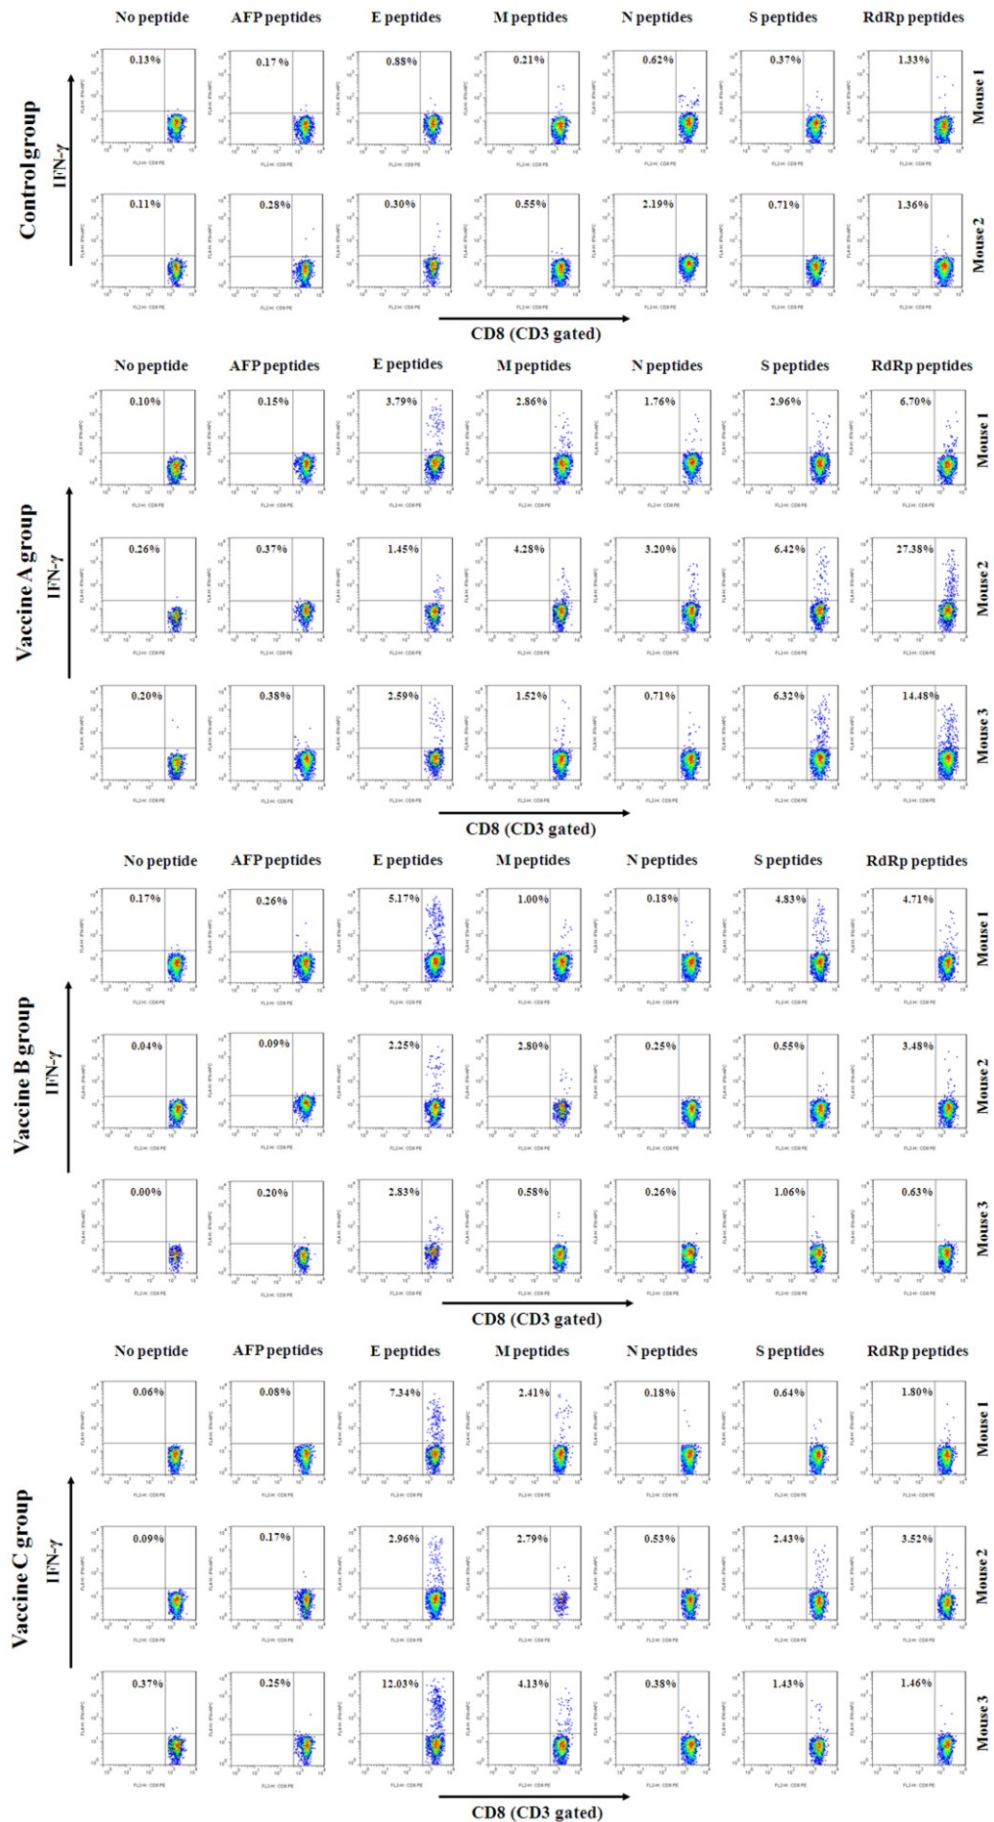



1177  
1178  
1179  
1180  
1181

Figure 6:

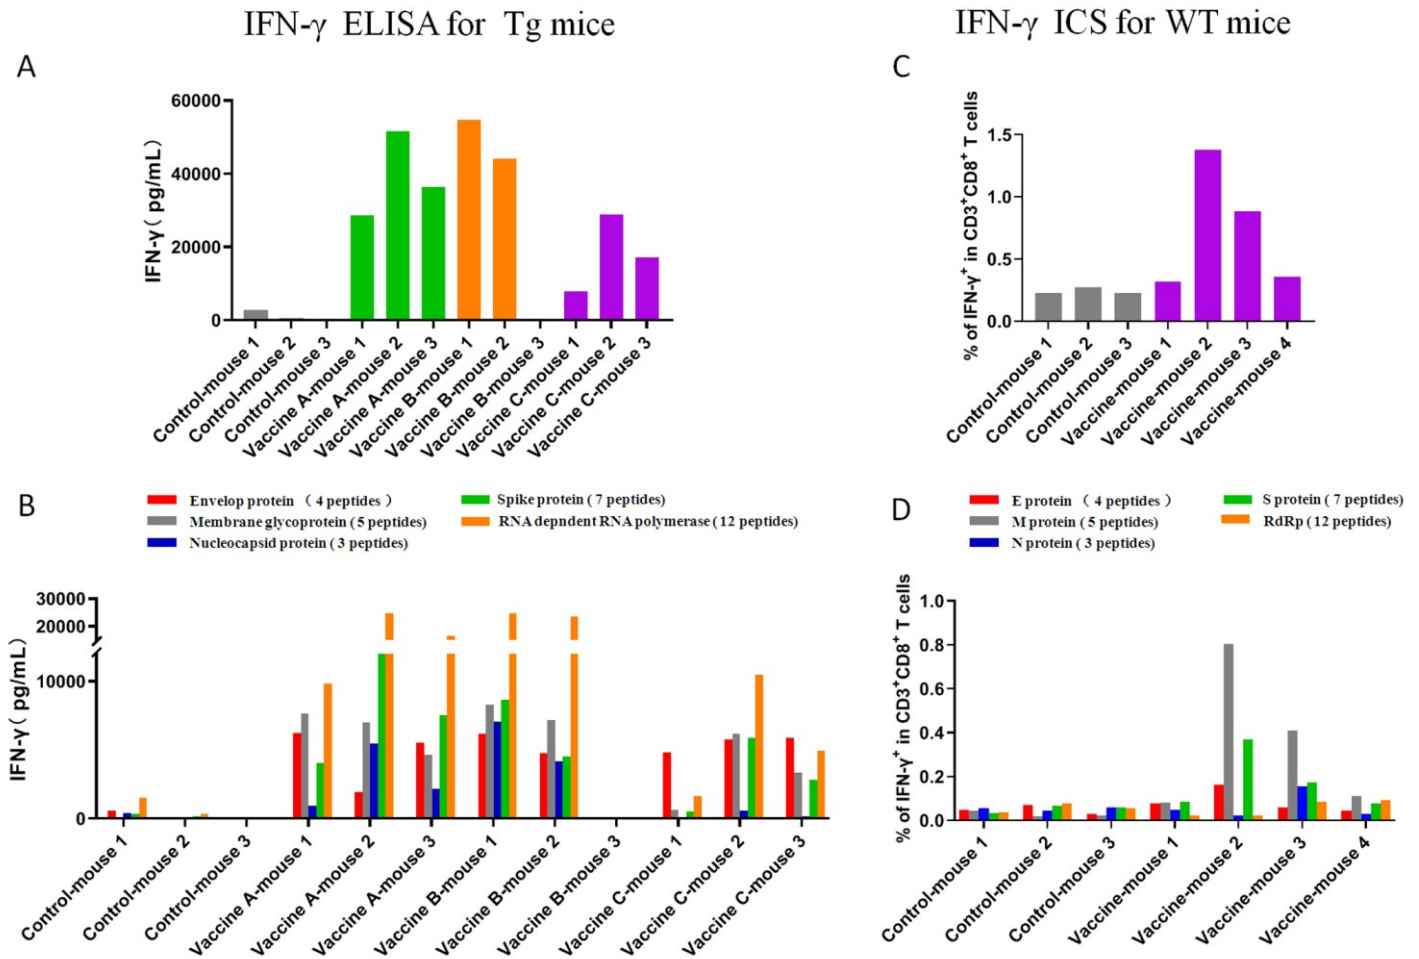

1206  
1207  
1208  
1209  
1210  
1211  
1212  
1213  
1214  
1215  
1216  
1217  
1218  
1219  
1220

1221 Figure 7:

1222

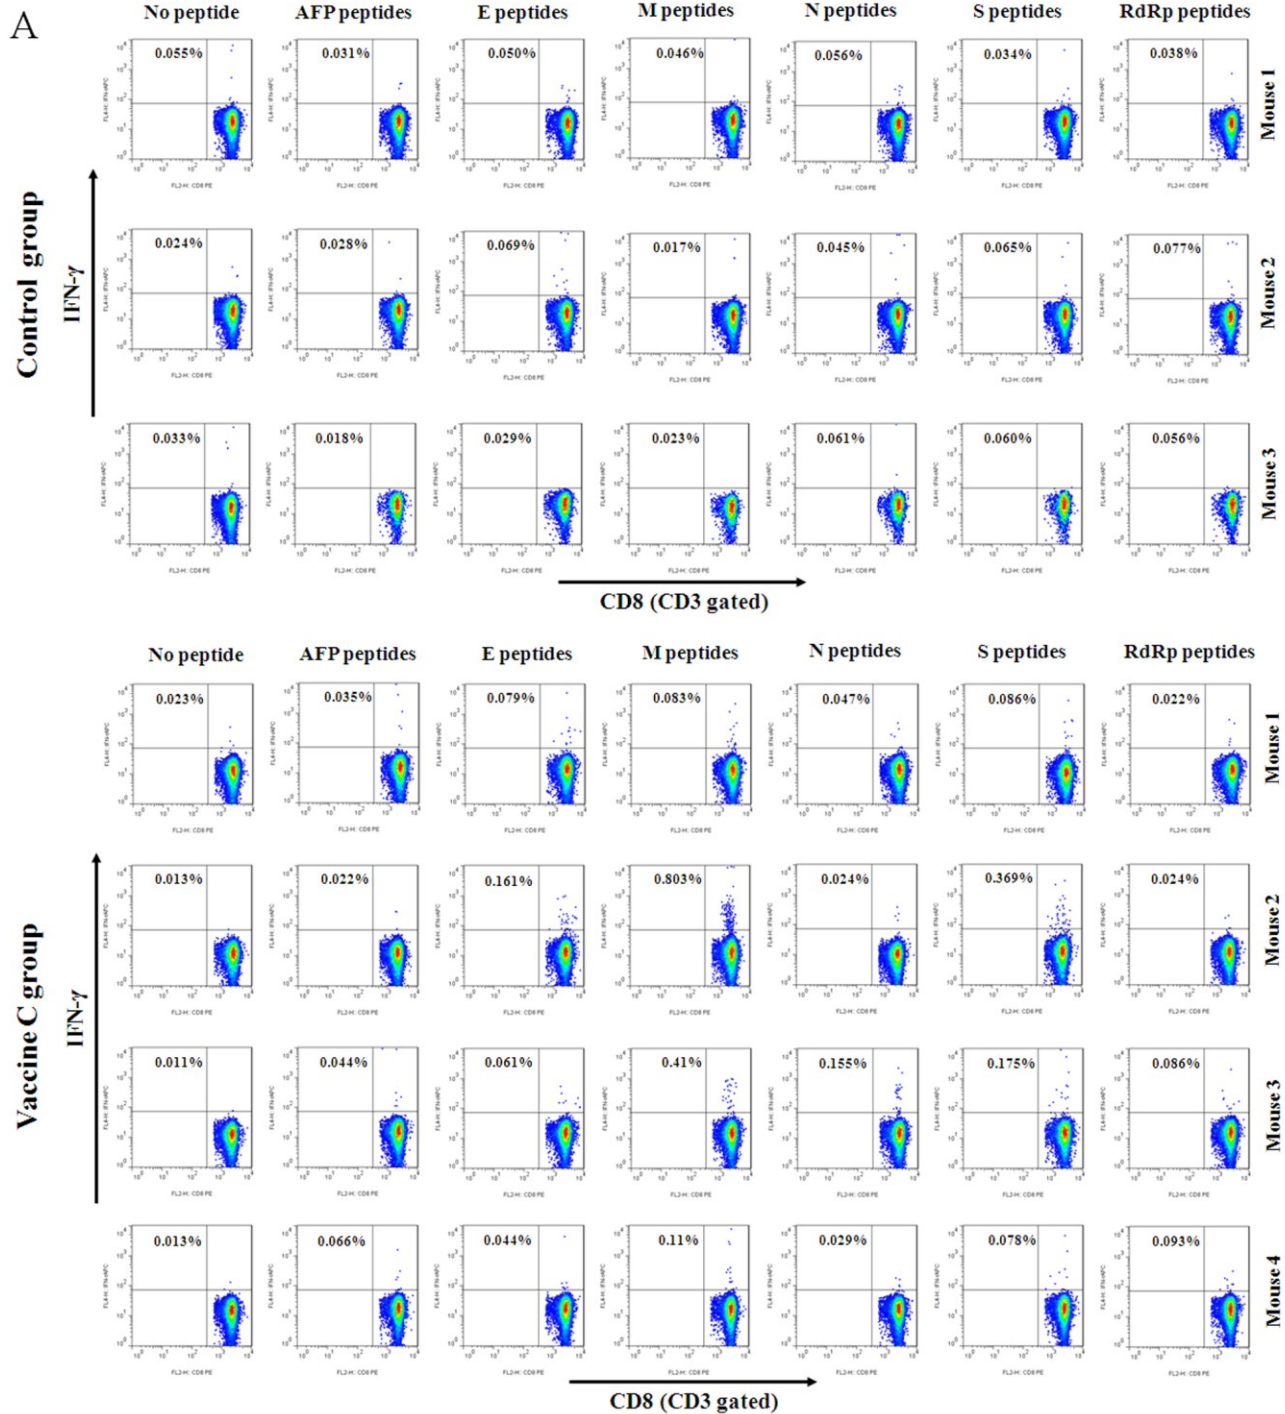

**B** Seven T cell epitopes cross-presented by H-2K/D<sup>b</sup> molecules in WT C57BL/6 mice

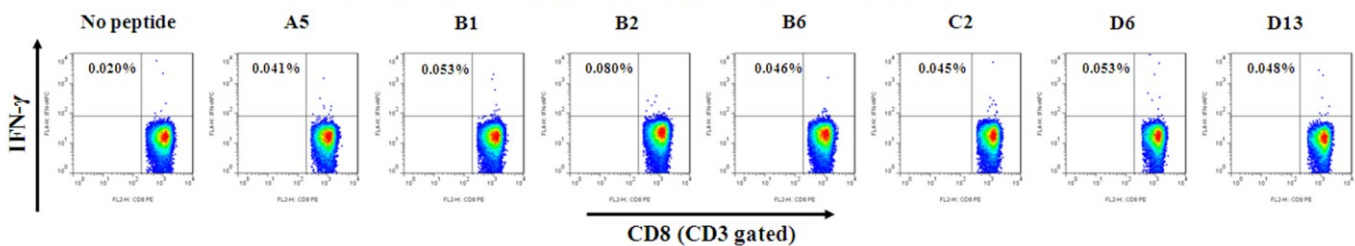

Source: https://www.biorxiv.org/content/10.1101/2021.04.01.438020v2.full.pdf
